# Supplementary material for: Patients’ and nurses’ views on providing psychological support within cardiac rehabilitation programmes: a qualitative study
Source: PubMed Central journal article supplement (PMC5589022; doi:10.1136/bmjopen-2017-017510), 2017-09-01
Supplement: bmjopen-2017-017510.draft_revisions.pdf [file bmjopen-2017-017510.draft_revisions.pdf]

# BMJ Open

BMJ Open is committed to open peer review. As part of this commitment we make the peer review history of every article we publish publicly available.

When an article is published we post the peer reviewers' comments and the authors' responses online. We also post the versions of the paper that were used during peer review. These are the versions that the peer review comments apply to.

The versions of the paper that follow are the versions that were submitted during the peer review process. They are not the versions of record or the final published versions. They should not be cited or distributed as the published version of this manuscript.

BMJ Open is an open access journal and the full, final, typeset and author-corrected version of record of the manuscript is available on our site with no access controls, subscription charges or pay-per-view fees (<http://bmjopen.bmj.com>).

If you have any questions on BMJ Open's open peer review process please email [info.bmjopen@bmj.com](mailto:info.bmjopen@bmj.com)

# BMJ Open

## Patients and nurses' views on providing psychological support within cardiac rehabilitation programmes: a qualitative study

|                                 |                                                                                                                                                                                                                                                                                                                                                                                                                                                                                                                                                                                                                                        |
|---------------------------------|----------------------------------------------------------------------------------------------------------------------------------------------------------------------------------------------------------------------------------------------------------------------------------------------------------------------------------------------------------------------------------------------------------------------------------------------------------------------------------------------------------------------------------------------------------------------------------------------------------------------------------------|
| Journal:                        | <i>BMJ Open</i>                                                                                                                                                                                                                                                                                                                                                                                                                                                                                                                                                                                                                        |
| Manuscript ID                   | bmjopen-2017-017510                                                                                                                                                                                                                                                                                                                                                                                                                                                                                                                                                                                                                    |
| Article Type:                   | Research                                                                                                                                                                                                                                                                                                                                                                                                                                                                                                                                                                                                                               |
| Date Submitted by the Author:   | 26-Apr-2017                                                                                                                                                                                                                                                                                                                                                                                                                                                                                                                                                                                                                            |
| Complete List of Authors:       | Turner, Katrina; University of Bristol, School of Social and Community Medicine; The National Institute for Health Research Collaboration for Leadership in Applied Health Research and Care West (NIHR CLAHRC West)<br>Winder, Rachel; University of Exeter Medical School<br>Campbell, John; University of Exeter, Primary Care;<br>Richards, David; University of Exeter, Medical School<br>Gandhi, Manish; Royal Devon and Exeter NHS Foundation Trust<br>Dickens, Chris; University of Exeter, University of Exeter Medical School<br>Richards, Suzanne; 2University of Exeter Medical School; Leeds Institute of Health Research |
| <b>Primary Subject Heading</b>: | Mental health                                                                                                                                                                                                                                                                                                                                                                                                                                                                                                                                                                                                                          |
| Secondary Subject Heading:      | Cardiovascular medicine, Qualitative research, Rehabilitation medicine                                                                                                                                                                                                                                                                                                                                                                                                                                                                                                                                                                 |
| Keywords:                       | depression, cardiac rehabilitation, QUALITATIVE RESEARCH, psychological support                                                                                                                                                                                                                                                                                                                                                                                                                                                                                                                                                        |
|                                 |                                                                                                                                                                                                                                                                                                                                                                                                                                                                                                                                                                                                                                        |

SCHOLARONE™  
Manuscripts

1  
2  
3 **Patients and nurses' views on providing psychological support within cardiac**  
4  
5 **rehabilitation programmes: a qualitative study**  
6  
7

8  
9  
10 **Corresponding author**

11 Katrina M Turner

12  
13 School of Social and Community Medicine, University of Bristol, Canynge Hall, 39 Whatley  
14 Road, Bristol, BS8 2PS.  
15

16  
17 The National Institute for Health Research Collaboration for Leadership in Applied Health  
18 Research and Care West (NIHR CLAHRC West) at University Hospitals Bristol NHS  
19 Foundation Trust.  
20

21 Katrina.turner@bristol.ac.uk, 0117 331 4559  
22  
23  
24

25  
26  
27  
28  
29 **Co-authors**

30 Rachel Winder, University of Exeter Medical School, Exeter, UK

31 John Campbell, University of Exeter Medical School, Exeter, UK

32 David A Richards, University of Exeter Medical School, Exeter, UK

33 Manish Gandhi, Royal Devon and Exeter NHS Foundation Trust, Exeter, UK

34 Chris Dickens, University of Exeter Medical School, Exeter, UK

35 Suzanne Richards, University of Exeter Medical School, Exeter, UK; Leeds Institute of  
36 Health Research, Leeds, UK  
37  
38  
39  
40  
41  
42  
43  
44  
45  
46  
47  
48  
49  
50  
51  
52  
53  
54  
55  
56  
57  
58  
59  
60

**Abstract**

**Objective:** To explore patients and nurses' views on the feasibility and acceptability of providing psychological care within cardiac rehabilitation services.

**Design:** In-depth interviews analysed thematically.

**Participants:** 18 patients and 7 cardiac nurses taking part in a pilot trial (CADENCE) of an enhanced psychological intervention (EPC) delivered within cardiac rehabilitation programmes by nurses to patients diagnosed with depression.

**Setting:** Cardiac services based in the South West of England and the East Midlands, UK.

**Results:** Patients and nurses viewed psychological support as central to good cardiac rehabilitation. Patients' accounts highlighted the significant and immediate adverse effect a cardiac event can have on an individual's mental wellbeing. They also showed that patients valued nurses attending to both their mental and physical health, and felt this was essential to their overall recovery. Nurses were committed to providing psychological support, believed it benefited patients, and advocated for this support to be delivered within cardiac rehabilitation programmes rather than within a parallel health care service. However, nurses were time-constrained and found it challenging to provide psychological care within their existing workloads.

**Conclusions:** Both patients and nurses highly value psychological support being delivered within cardiac rehabilitation programmes but resource constraints raise barriers to implementation. Consideration, therefore, should be given to alternative forms of delivery which do not rely solely upon nurses to enable patients to receive psychological support during cardiac rehabilitation.

**Trial registration:** ISCTRN34701576, 29 May 2014.

**Strengths and limitations of this study**

- This is the first study to detail both patients and nurses' views on providing psychological care within cardiac rehabilitation services.
- Interviews were held with patients receiving care in 7 different cardiac rehabilitation teams, and with nurses from four of these teams.
- Employing in-depth interviews ensured interviewees could raise issues that were salient to them and not predicted by the research team.
- The relatively small number of patients and nurses recruited to the CADENCE pilot trial limited the number of interviews that could be conducted, and the extent to which individuals could be purposefully sample to ensure maximum variation within the sample.
- The views expressed by interviewees about the provision of psychological care within cardiac rehabilitation services may have been influenced by their experiences of the CADENCE trial.

## Background

About 20% of individuals with coronary heart disease (CHD) report symptoms of depression.<sup>1</sup> This proportion is approximately four times greater than the levels identified within the general population.<sup>2</sup> As depression among patients with CHD is associated with greater risk of subsequent cardiac morbidity and mortality,<sup>3-7</sup> there is national and international recognition that the detection and treatment of depression among these patients is important.<sup>8-10</sup>

Routine clinical care for patients with CHD who have experienced acute coronary syndrome includes the provision of cardiac rehabilitation. The British Association for Cardiovascular Prevention and Rehabilitation's (BACPR) guidance<sup>8</sup> states that usual cardiac rehabilitation should include psychological support. The majority of people attending cardiac rehabilitation in the UK, however, do not receive psychological care.<sup>11</sup>

Cardiac rehabilitation programmes usually involve an initial assessment followed by a structured programme that lasts between 6 to 8 weeks. This programme may include clinic appointments where patients' cardiac symptoms are monitored and discussed, supervised exercise sessions and educational talks. Programmes are delivered primarily by cardiac nurse specialists, who are supported by physiotherapists. In terms of how nurses can best provide psychological support to patients undergoing rehabilitation, possible models include them delivering psychological support within the structured programme, referring patients onto other mainstream health services providing treatment for depression, and/or external mental health practitioners working closely with cardiac nurses to deliver psychological care to their patients. It is not known which approach would be most acceptable to patients and nurses. Little is known about patients and nurses' views and experiences of receiving/delivering psychological support within cardiac rehabilitation programmes. Simmonds et al<sup>12</sup> explored patients' views and experiences of living with depression and CHD, and Paquet et al<sup>13</sup>

1  
2  
3 assessed patients' experiences of care received during the first three months following a  
4 cardiac event requiring hospitalisation, but neither study explored patients' views of any  
5 formal psychological support they had received during their rehabilitation, nor how they  
6 thought this care should be given. To date, no study has documented cardiac nurses' views of  
7 this area.  
8  
9

10  
11  
12  
13  
14 The recently completed CADENCE study developed and piloted an enhanced psychological  
15 care (EPC) intervention for patients presenting with depressive symptoms following a cardiac  
16 event who attended cardiac rehabilitation.<sup>14</sup> EPC was delivered by cardiac nurse specialists,  
17 within their existing workloads and embedded within the structured cardiac rehabilitation  
18 programme. It consisted of mental health care coordination and a patient led, nurse supported  
19 programme of behavioural activation (BA). The care co-ordination aspect of the intervention  
20 was based on current NICE guidance.<sup>15,16</sup> BA is a simple psychological treatment for  
21 depression that aims to re-engage patients with positively reinforcing experiences and reduce  
22 avoidance behaviours.<sup>17</sup> It is no less clinically effective but more cost effective than  
23 cognitive behavioural therapy in treating depression in adults.<sup>18</sup>  
24  
25  
26  
27  
28  
29  
30  
31  
32  
33  
34  
35

36 The CADENCE study included a feasibility study and external pilot cluster randomized  
37 controlled trial. As part of the pilot trial, in-depth interviews were held with patients and with  
38 nurses who, as part of the study, had been trained to deliver EPC. They explored patients and  
39 nurses' views on the provision of psychological support within cardiac rehabilitation  
40 programmes and, where appropriate, their experiences of receiving/implementing EPC. This  
41 paper details findings from these interviews. It reports patients and nurses' views on the  
42 feasibility and acceptability of providing psychological care within cardiac rehabilitation  
43 services, reflecting on how such care could be most appropriately delivered in the future.  
44  
45  
46  
47  
48  
49  
50  
51  
52  
53

## 54 **Methods**

### 55 *The CADENCE pilot trial*

56  
57  
58  
59  
60

1  
2  
3 Twenty cardiac rehabilitation teams were approached to take part in the pilot trial between  
4  
5 December 2014 and February 2015. Eight teams agreed to participate. They were based in  
6  
7 the South West of England or the East Midlands. Five of the participating teams were  
8  
9 randomised to EPC and three to usual care (UC). Nurses in all 8 participating teams were  
10  
11 responsible for screening and recruiting patients.  
12

13  
14 Patients were eligible to take part if they were 18 years old or over, referred for cardiac  
15  
16 rehabilitation based on local clinical referral protocols and scored ten or more on the Patient  
17  
18 Health Questionnaire-9 (PHQ-9).<sup>19</sup> Patients were not eligible if they reported being treated  
19  
20 for depression in the six months before their acute cardiac event; if there was evidence of  
21  
22 alcohol or drug dependency; where the participant was acutely suicidal; or where there was  
23  
24 evidence of poorly controlled bipolar disorder or psychosis/psychotic symptoms.  
25  
26

27  
28 Eleven cardiac rehabilitation nurses working in the five intervention teams were trained, over  
29  
30 two days, in how to deliver EPC. The training covered mental health care coordination, how  
31  
32 to support patients working with a BA self-help manual, assessment and management of  
33  
34 psychiatric risk, and how to use the CADENCE materials, e.g. the clinical materials to be  
35  
36 used during BA sessions. Whilst delivering EPC to patients, each nurse received clinical  
37  
38 supervision every fortnight from an accredited BA therapist. This was held by telephone,  
39  
40 either on an individual basis or in conjunction with other study nurses within their own team.  
41  
42 Seven of the participating teams managed to recruit patients to the trial. In total, 29 patients  
43  
44 were recruited (15 EPC and 14 UC). All patients and nurses involved in the trial, at the time  
45  
46 of being recruited to the study, agreed to their contact details being passed onto the  
47  
48 qualitative research team so they could be approached for interview.  
49  
50

### 51 52 ***Patient and nurse interviews*** 53

54  
55 Patients were interviewed once they had completed their five month follow-up in the trial, in  
56  
57 case the interview influenced their views of the intervention or the study. Also, by this time,  
58  
59  
60



1  
2  
3 most individuals had completed their cardiac rehabilitation. The intention was to  
4  
5 purposefully sample interviewees on the basis of age, gender, recruiting team and, in the case  
6  
7 of the EPC participants, adherence to EPC. However, as it took longer than expected to  
8  
9 recruit patients to the trial, in the end, all 15 EPC patients and 6 of the UC patients were  
10  
11 approached for interview.  
12

13  
14 Two of the EPC patients approached were uncontactable and another EPC patient declined to  
15  
16 be interviewed. Thus, interviews were held with a total of 18 patients (12 EPC and 6 UC).  
17  
18 These interviewees were recruited across the seven participating teams who had recruited  
19  
20 patients to the trial. Patients were interviewed by RW, a researcher with over 10 years'  
21  
22 experience of conducting qualitative research, between January and June 2016. The initial  
23  
24 two interviews were held on a face-to-face basis. The remaining interviews were held by  
25  
26 telephone, as interviewees were based across a large geographical area and because well  
27  
28 planned telephone interviews can gather the same material as interviews held face-to-face.<sup>20</sup>  
29  
30

31  
32 The two individuals interviewed in person provided written consent to take part at the time of  
33  
34 interview. Individuals interviewed over the telephone were posted a consent form and asked  
35  
36 to complete and return it to RW, using a pre-paid envelope, prior to interview.  
37

38  
39 A topic guide was used to ensure consistency across the interviews. It was based on the aims  
40  
41 of the research, a review of relevant literature, and the researchers' knowledge of cardiac  
42  
43 rehabilitation and the intervention. Two versions of the guide were used: one for the EPC  
44  
45 arm and one for the UC arm. Both included questions about the patient's cardiac event,  
46  
47 experience of cardiac rehabilitation, mental wellbeing during treatment, and relationship with  
48  
49 the cardiac nurse. The version used with the EPC arm also included questions about  
50  
51 experience of EPC and treatment adherence.  
52

53  
54 Eight of the eighteen patients interviewed were male and all the interviewees reported their  
55  
56 ethnicity as White British. The mean age of interviewees was 67.0 (age range 50-79 years)  
57  
58  
59  
60

1  
2  
3 and their average pre-treatment PHQ-9 score was 13.9. Cardiac events reported by the  
4  
5 patients included heart attacks, angina, cardiomyopathy, heart failure and valve disorder  
6  
7 treated through coronary artery bypass grafts, stent insertion, valve replacement, medication  
8  
9 or a combination of these. All interviewees had attended at least one cardiac nurse  
10  
11 appointment, and most had completed a structured cardiac rehabilitation programme. The  
12  
13 interviews with EPC patients on average lasted longer than those held with UC patients (52  
14  
15 minutes versus 32 minutes).  
16  
17

18 Seven nurses (all female) from four of the five intervention teams were interviewed. No  
19  
20 nurses from the fifth team were interviewed as this team did not recruit any patients. Nurses  
21  
22 were interviewed once they had delivered EPC to one or more patients. A topic guide was  
23  
24 used and covered the following areas: experience of delivering EPC, dealing with patients at  
25  
26 risk of suicide or self-harm, and impact of delivering psychological care on their relationship  
27  
28 with patients.  
29  
30

31  
32 The nurse interviews were held by RW between December 2015 and March 2016. RW was  
33  
34 known to the nurses, as she had observed the two training days. The first three nurse  
35  
36 interviews were conducted in person. The remaining four were held by telephone, as these  
37  
38 nurses were geographically dispersed. As in the case of the patient interviews, nurses  
39  
40 provided written consent to be interviewed at the time interview, or completed and returned a  
41  
42 consent form prior to interview, depending on whether they were interviewed in person or  
43  
44 over the telephone. At the time of interview, each nurse had delivered EPC to between one  
45  
46 and four patients. The interviews lasted between 38 to 64 minutes.  
47  
48

49 Ethical approval to conduct the pilot trial and the qualitative work nested within it, was given  
50  
51 by NRES Committee South West – Exeter (reference: 14/SW/0139).  
52  
53

54 *Data analysis*  
55  
56  
57  
58  
59  
60

1  
2  
3 Data collection and analysis proceeded in parallel, so that early insights could inform the  
4 focus of later interviews. Both patient and nurse interviews were audio recorded and fully  
5 transcribed. Both interview sets were analysed thematically, as this allowed comparisons to  
6 be made within and across the interviews and highlighted patient and nurse views towards  
7 specific issues, e.g. the feasibility of cardiac nurses providing psychological care.

8  
9  
10 Initially, KMT and RW independently read a sample of nurse and patient transcripts in order  
11 to identify emerging themes and to develop a preliminary coding frame. They then met to  
12 discuss their coding. This discussion led to two coding frames being drafted: one for each  
13 data set. Where possible, similar codes were used within each coding frame to assist  
14 triangulation of nurse and patient accounts. Once the coding frames had been agreed,  
15 transcripts were manually coded and data pertaining to each code summarised in tables using  
16 an approach based on framework analysis.<sup>21</sup> The researchers then read and re-read the tables  
17 to identify key themes and deviant cases, and to highlight similarities and differences  
18 between the data sets.

## 33 34 **Results**

35  
36 Analysis of the data highlighted patients and nurses' views on the importance and benefits of  
37 providing psychological care within cardiac rehabilitation programmes, indicated the extent  
38 to which patients and nurses felt it was acceptable and practical for nurses to provide this  
39 care, and identified issues relevant to service planners regarding when, where and how  
40 psychological support should be provided in cardiac rehabilitation.

41  
42 Below, quotes have been reproduced to illustrate key points. They have been tagged  
43 according to whether a patient or nurse is being quoted, and using the interviewee's assigned  
44 identification (ID) number.

### 53 54 ***The need for psychological support***

1  
2  
3 Both EPC and UC patients described the significant impact their cardiac event had had on  
4 their emotional wellbeing. Most reported experiencing a dramatic loss of self-confidence,  
5 panic attacks, sleeplessness, and/or a lack of energy and motivation. One individual stated  
6 that he had felt '*mentally and physically shell-shocked*' (EPC, patient 12) and others  
7 described how they had been suicidal:  
8  
9

10  
11  
12  
13  
14 *'It just all came out and I was surprised at myself, to be honest, I had no idea that I*  
15 *was, my overwhelming feeling was disappointment that I'd actually survived and that*  
16 *frightened me because I've never felt that before [suicidal]...' EPC, patient 14*  
17  
18 *'I don't show it [how they feel] ... you feel really drained and really start thinking the*  
19 *worst and what's the easiest way out which is, and then you think "which is the*  
20 *easiest way out tablets or." [speech trailed off]' EPC, patient 9*  
21  
22  
23  
24  
25  
26

27 The intensity of this emotional response may have been partly due to the fact that patients  
28 were aware of the contrast between their former and current self, and what they had lost  
29 following their cardiac event:  
30  
31  
32

33  
34 *'It was a horrible, horrible experience, I just felt my life was ebbing away, and I've*  
35 *never felt that low before... I had no go in me, no energy, no focus, horrible, horrible*  
36 *sensation.'* UC, patient 2  
37  
38  
39  
40 *'I was angry, frightened, upset... I got very depressed, I lost my job, I loved my job...*  
41 *suddenly everything had been ripped out from under my feet and I got very depressed,*  
42 *very anxious and felt a failure.'* EPC, patient 17  
43  
44  
45  
46

47 Some patients described feeling supported by family and friends, while others detailed how  
48 they had been unable to discuss how they felt with others. In addition, most patients reported  
49 the time between being discharged from hospital to their first cardiac rehabilitation  
50 appointment as particularly difficult. Several patients described feeling lonely as they had  
51 very little or no family around, and others recalled feeling unable to cope after the '*cossetted*'  
52  
53  
54  
55  
56  
57  
58  
59  
60

1  
2  
3 (EPC patient 13) hospital environment and cut ‘*adrift*’ (EPC patient 14) from professional  
4  
5 help upon hospital discharge.  
6

7  
8 When focusing on the nurse accounts, it was apparent that all the nurses viewed  
9  
10 psychological care as a core component of cardiac rehabilitation and had provided  
11  
12 psychological support prior to their involvement in CADENCE. Nurses had routinely  
13  
14 screened for depression and anxiety using Hospital Anxiety and Depression Scale (HADS).<sup>22</sup>  
15  
16 In terms of the content of psychological support provided, there was local variation. Most  
17  
18 nurses had provided support by giving talks on stress and relaxation, and some had also  
19  
20 referred patients to their GP or encouraged patients to self-refer to Improving Access to  
21  
22 Psychological Therapies (IAPT) services, which some nurses described as having good  
23  
24 relations with. Interestingly, one nurse’s comments implied the psychological aspects of  
25  
26 cardiac rehabilitation could dominate over the physical:  
27  
28

29  
30 *‘I’ve got to be honest, I mean, sometimes I’ve left a cardiac rehabilitation clinic and*  
31  
32 *all that we have addressed is the psychological side of things.’* Nurse 5  
33

34  
35 Having been asked within the trial to screen patients using the PHQ-9, which includes a  
36  
37 question specifically about suicidal thoughts, nurses became aware that when previously  
38  
39 using the HADS, they might not have identified patients who were at risk:  
40

41  
42 *‘Now it’s a lot more formalised and I’m more aware of that patient, because before I*  
43  
44 *wasn’t picking them up, because I wasn’t doing the PHQ-9.’* Nurse 1  
45

46  
47 Some nurses described being surprised by how frequently they now identified patients with  
48  
49 such thoughts, and how completing the questionnaire provided patients with an opportunity  
50  
51 to discuss their mental health which would often ‘*come a bit out of the blue*’ (Nurse 4).  
52

53 ***The acceptability and feasibility of nurses providing psychological care***  
54  
55  
56  
57  
58  
59  
60

1  
2  
3 Both EPC and UC patients said they had developed good relationships with their cardiac  
4 nurse and viewed them as someone they could talk to. The UC patients, however, described  
5 how they had not discussed their mental wellbeing with their nurse in any detail, if at all.  
6  
7

8  
9 Interviewer: *'Did the nurse talk to you at all about your anxiety at the time or  
10 anything that she could help you with, did she give you a leaflet or did she talk about  
11 it?'*  
12

13  
14 UC, patient 1: *'No, no, because I don't expect she knew about it. Unless she knew  
15 about it and didn't say nothing. As far as I can remember, it was never ever talked  
16 about.'*  
17  
18  
19  
20  
21

22  
23 EPC patients reported receiving EPC before, during or after attending their rehabilitation  
24 fitness session. They had welcomed the opportunity to talk about their emotions, felt  
25 comfortable with their nurse providing both physical and mental support, and were confident  
26 in the nurse's ability to do this. It was also apparent that they valued the focus of their care  
27 encompassing both their mental and physical health:  
28  
29  
30  
31  
32

33  
34 *'It was a good surprise in that I thought the cardiac rehab would just be "Hello! Do  
35 a few exercises" and that's it. I thought it was really brilliant, that it was looked at  
36 holistically, brilliant. I came out thinking, "oh this is a real breath of fresh air, that  
37 people should actually look at me as a total person and not just as a patient with a  
38 dodgy heart" sort of thing.'* EPC, patient 13  
39  
40  
41  
42  
43

44  
45 *'To have somebody that deals with the mental health side as well as the physical I  
46 think is incredibly important... it shouldn't be just about rehabilitating the body, it  
47 should be rehabilitating the mind as well.'* EPC, patient 17  
48  
49  
50

51  
52 EPC patients viewed the one-to-one dedicated time they had had with their nurse to discuss  
53 their mental health as crucial to their physical and mental recovery, and two participants who  
54 had experienced suicidal thoughts described this input as lifesaving:  
55  
56  
57  
58  
59  
60

1  
2  
3           *'Without people like you and [name of nurse] talking to me and me talking to you, I*  
4  
5           *might not be here now.'* EPC, patient 8  
6

7           *I think a lot of people when they commit suicide and things like that... they just feel*  
8  
9           *useless to everybody and nobody and the good thing with that [EPC] is they do help*  
10  
11           *you... it's certainly helped me.'* EPC, patient 9  
12  
13

14 Talking to a nurse had allowed patients to express how they felt, to better understand why  
15 they felt low, and had encouraged them to talk to others. In addition, EPC patients described  
16 how BA had enabled them to see the link between their mood and certain activities, which in  
17 turn had led to them changing or increasing activities to improve their mood.  
18  
19

20  
21  
22 However, despite valuing the care they had received, some EPC patients commented that  
23 they would have liked more psychological support but were aware of the '*tremendous*  
24  
25  
26  
27  
28  
29  
30  
31  
32  
33  
34  
35  
36  
37  
38  
39  
40  
41  
42  
43  
44  
45  
46  
47  
48  
49  
50  
51  
52  
53  
54  
55  
56  
57  
58  
59  
60  
*pressure'* (EPC patient 12) nurses were working under, so felt it would be inappropriate to  
ask for more time. Also, not all patients felt nurses were best placed to deal with their mental  
health needs. For example, one patient commented that she did not want to talk about mental  
health with a 'physical' health practitioner. In addition, several patients mentioned they had  
received their EPC session in a corner of the gym or leisure centre because the nurse did not  
have access to a private room. Although most participants said they were not worried about  
the lack of privacy, one participant described how she felt uncomfortable discussing her  
emotions in public.

Comments by nurses indicated that they felt capable of providing psychological care. They  
described the training they had received as part of CADENCE as covering everything they  
needed to know and stated that, with experience, they had found ways to deliver EPC  
smoothly. In addition, one nurse commented that patients learnt quickly and implied that as  
patients progressed through treatment, less work was involved:

1  
2  
3 *'Within a couple of weeks I think the patients saw very quickly how their mood was*  
4 *related to their activities and they got it very quickly. So after that actually the time*  
5 *spent with them prior to the group was more as you say coordinating them to the next*  
6 *phase ... and actually moving them onto actually allocating routine activities.'* Nurse  
7  
8  
9  
10  
11  
12 2

13  
14 Nurses commented that, having completed the CADENCE training, they felt more able to  
15 effectively treat depression and had formalised their approach. They also said they now spent  
16 more designated time with patients discussing mental health, which they felt patients valued,  
17 and thought BA had encouraged patients to be more physically and socially active. However,  
18 nurses described how delivering EPC could be time consuming. An EPC session  
19 incorporating the BA component could take between 10 and 40 minutes, and even longer if  
20 the PHQ-9 indicated that the patient was 'at risk'. Time was also needed to receive clinical  
21 supervision and to chase patients who had not attended. The impact of this increased  
22 workload meant nurses shortened their lunch breaks, delayed going home, ran late with other  
23 patients and/or asked a colleague to 'double up' (Nurse 6) so one of them could focus on the  
24 EPC patient while the other took the fitness session.

25  
26  
27  
28  
29  
30  
31  
32  
33  
34  
35  
36  
37  
38  
39  
40  
41  
42  
43  
44  
45  
46  
47  
48  
49  
50  
51  
52  
53  
54  
55  
56  
57  
58  
59  
60  
This increase in workload also meant some nurses felt 'lucky' (nurses 1, 2, 6) that they had  
not needed to see more than one EPC patient at the same rehabilitation session or on the same  
day. One nurse (2) also said it would be 'mind-numbingly brain taxing' to deliver EPC to  
more than one person in the same session or on the same day, suggesting nurses would also  
have experienced this situation as mentally and emotionally demanding.

In addition to having limited time, nurses reported having little or no access to a private room  
where they could talk to patients about sensitive issues. Most nurses worked across various  
sites, either within their hospital or within the community e.g. leisure centres or health  
centres. A lack of space led to nurses asking EPC patients to come early to a rehabilitation



1  
2  
3 session or to stay on afterwards, and talking to patients in a quiet corner of the fitness room.

4  
5 The latter situation was viewed as not ideal but perhaps less intimidating for patients than  
6  
7 meeting in a private room.

### 8 9 ***When and how to provide psychological care for depression***

10  
11 Patients felt that embedding psychological support for low mood within cardiac rehabilitation  
12  
13 was timely and appropriate. However, some commented they would also have liked to have  
14  
15 commenced such care earlier, either when in hospital following their cardiac event or  
16  
17 immediately following hospital discharge, as they had experienced this time as particularly  
18  
19 difficult. Patients also thought psychological support should be continued beyond cardiac  
20  
21 rehabilitation if it was still needed:  
22  
23

24  
25 *'I think additional help after this [end of EPC] is a definite must for some people, it*  
26  
27 *was for me... if they [your nurse] feel that you need more help, that should be offered*  
28  
29 *definitely. Or if it's a waste of time, cos you just literally will go back to how you were*  
30  
31 *before, I think.'* EPC, patient 11  
32  
33

34  
35 Some patients suggested some aspects of EPC could be delivered within a group, as they had  
36  
37 found it reassuring to talk to other patients about their experiences and to hear about theirs.  
38  
39 However, other patients thought a group environment might inhibit what individuals  
40  
41 discussed, acknowledging that they themselves would struggle to publically talk about their  
42  
43 emotions.

44  
45 Some patients had been care coordinated to other services, e.g. to their GP or to IAPT  
46  
47 services, and had found this beneficial. However, six EPC patients said they would not  
48  
49 discuss their mental health with their GP, believing that their GP would only prescribe an  
50  
51 antidepressant:  
52  
53

54  
55 *'I'd say what's the point in me going to the doctors, he gives me these bloody tablets,*  
56  
57 *I'm not going to live on sodding tablets, what's the point?'* EPC, patient 9  
58  
59  
60

1  
2  
3 Nurses commented that patients who had scored just below 10 on the PHQ-9 may have  
4 benefited from receiving psychological support. They also raised the possibility of delivering  
5 psychological support to groups rather than individual patients, as they too realised that  
6  
7 individuals could benefit from talking about their experiences with others:  
8  
9

10  
11 *'Patients get a huge amount of benefit just in talking to each other, don't they, and so*  
12 *the problem, the trouble solving, the solutions, "oh I do this", and just seeing how*  
13 *other people are getting on, the little supportive networks that they strike up when*  
14 *they're actually in the waiting room waiting for us to assess them and they've already*  
15 *got their own counselling and social network going on there, so I do recognise the*  
16 *power of actually getting them together as a group.'* Nurse 5  
17  
18  
19  
20  
21  
22  
23  
24

25 Yet, like patients, they also acknowledged that some patients would not want to discuss their  
26 personal views in front of others. A suggested possible solution was to have an introductory  
27 EPC session in a group setting, and then offer one-to-one sessions to explore personal issues.  
28 In terms of where to provide psychological support, nurses were aware that often patients did  
29 not want to be referred to their GP and described how patients had declined referrals to other  
30 services for their mental health. They also felt that integrating psychological care within  
31 cardiac rehabilitation had led to patients being more receptive and willing to address their  
32 mental health:  
33  
34  
35  
36  
37  
38  
39  
40  
41  
42

43 *'...ninety percent of the time people would say "no I don't want to do that [be*  
44 *referred] I'm just going to work through it, I'm going to see how I get on". So actually*  
45 *being able to offer an extra option that didn't involve all of that, people were more*  
46 *receptive.'* Nurse 2  
47  
48  
49  
50

51 Nurses also remarked that when they had referred patients to another service, they were not  
52 informed whether or not the patients had attended. Thus, although recognised as a challenge,  
53 most nurses commented that if additional resources could be made available, then integrating  
54  
55  
56  
57  
58  
59  
60

1  
2  
3 psychological support, such as EPC, within cardiac rehabilitation programmes would be the  
4  
5 ideal situation.  
6

## 7 **Discussion**

8  
9 Both patient and nurse accounts highlighted the need to provide psychological support to  
10  
11 patients with low mood receiving cardiac rehabilitation. Patients detailed the significant  
12  
13 emotional impact their cardiac event had on them, and described psychological support as not  
14  
15 only key to their mental recovery but also as supporting their physical wellbeing. Prior to  
16  
17 their involvement in CADENCE, nurses had viewed psychological care as an essential part of  
18  
19 their role. The training they had received during the CADENCE trial had led them to  
20  
21 formalise their approach and to spend more dedicated time one-to-one time with patients.  
22  
23 Both patients and nurses' accounts suggested that psychological support should be embedded  
24  
25 within cardiac rehabilitation programmes, rather than provided out with through a parallel  
26  
27 service, and that EPC appeared effective in treating depression in this patient group.  
28  
29 However, it was apparent that nurses were time-constrained and found it challenging to  
30  
31 provide psychological support within their existing workloads.  
32  
33

34  
35 In terms of future delivery of psychological support, this study raised issues relevant to when,  
36  
37 where and how this could be done. Patients interviewed argued for psychological support to  
38  
39 commence earlier, either during hospital immediately following a cardiac event or upon  
40  
41 hospital discharge, and to continue after discharge from a rehabilitation programme where  
42  
43 necessary. On average, most patients spend only three days in hospital following a heart  
44  
45 attack<sup>23</sup> and are discharged back to the community with no formal support during the initial  
46  
47 weeks prior to commencing cardiac rehabilitation. Patients in this study talked about feeling  
48  
49 lonely and cut adrift from professional help following hospital discharge, and this appeared to  
50  
51 compound their low mood. They also described a sense of loss; loss of ability, loss of  
52  
53 confidence and a loss of roles. The theme of loss was one that underpinned all the interviews  
54  
55  
56  
57  
58  
59  
60

1  
2  
3 conducted by Simmonds et al in their study of patients' views and experiences of living with  
4 depression and CHD. It is also discussed by Barley et al<sup>24</sup>, who report primary care  
5 practitioners viewing patients' loss of a valued role or ability to fulfil responsibilities as  
6 contributing to the development of depression following a cardiac event.  
7  
8

9  
10  
11 Our findings suggest psychological support should be embedded within cardiac rehabilitation  
12 programmes, as patients welcomed cardiac nurses attending to both their physical and mental  
13 wellbeing, viewing this as providing a more holistic approach. In addition, nurses felt  
14 integrating psychological support within existing programmes encouraged patients to  
15 acknowledge their need for psychological input. Nurses were also aware that patients often  
16 declined referrals to other services, and both patients and nurses mentioned patients'  
17 reluctance to consult a GP about their mental health.  
18  
19

20  
21  
22 Whole system approaches that integrate mental and physical health care are viewed as the  
23 most appropriate way to support patients living with mental and physical morbidity,<sup>25</sup> and  
24 other researchers have reported patients with CHD and depression as being ambivalent about  
25 seeking help from a GP.<sup>12</sup> Here patients linked this reluctance to their assumption that a GP  
26 would prescribe an antidepressant. Yet GPs may be hesitant to prescribe antidepressants for  
27 patients with CHD, as they are aware patients may be unwilling to take an antidepressant and  
28 view other forms of treatment that encourage patients to be physically and socially active as  
29 potentially more effective for depression in this patient population, e.g., exercise on referral,  
30 cardiac rehabilitation.<sup>24</sup>  
31  
32

33  
34  
35 Another reason patients might be reluctant to seek help is the stigma that surrounds mental  
36 health. Nurses reported patients only talking about low mood once the nurse had screened  
37 them as positive for low mood and/or at risk of suicide or self-harm. Non-disclosure of  
38 mental health problems by patients with physical conditions can compound management  
39 problems.<sup>26</sup> Here it was apparent that nurses had been able to identify patients at risk because  
40  
41  
42  
43  
44  
45  
46  
47  
48  
49  
50  
51  
52  
53  
54  
55  
56  
57  
58  
59  
60

1  
2  
3 they had been asked to screen patients using the PHQ-9, which explicitly asks about suicidal  
4 ideation. Thus, cardiac teams may want to consider using the PHQ-9 in the future, alongside  
5 training to ensure nurses manage self-harm risk appropriately and in a way that is consistent  
6 with clinical guidelines.<sup>15, 16</sup>

7  
8  
9  
10  
11 Although both patients and nurses advocated for psychological support to be provided within  
12 rehabilitation programmes, both acknowledged that nurses found it challenging to provide  
13 this care within their existing workloads. Group-based approaches were suggested, as both  
14 sets of interviewees were aware that patients could benefit from interacting with other cardiac  
15 patients. This could reduce nurse workload but whether group delivery would be possible  
16 would partly depend on the intervention. For an intervention such as EPC, where there were  
17 both general and patient-specific components, it might be possible for nurses to deliver some  
18 aspects of the intervention in a group setting and other components on a one-to-one. For  
19 example, BA could be discussed during group educational talks and care-coordination  
20 delivered on an individual basis. Doing so would ensure all patients receiving cardiac  
21 rehabilitation received information on BA; a move which would address the view expressed  
22 by nurses here, that psychological support could benefit all patients and not just those who  
23 had screened positive for depression. Such an approach would concur with the recent  
24 findings of Blumenthal et al,<sup>27</sup> who observed the potential benefit to longer-term  
25 psychological morbidity when stress management was offered to all patients following an  
26 acute cardiac event.

27  
28  
29  
30  
31  
32  
33  
34  
35  
36  
37  
38  
39  
40  
41  
42  
43  
44  
45  
46  
47 In terms of what psychological support should be provided, this paper did not focus on  
48 patients and nurses' specific views of EPC, as the aim was to assess their more general views  
49 on provision of psychological support. However, it was evident that nurses and patients  
50 viewed the patient-led, nurse supported BA component of the intervention as effective in  
51 helping patients manage their depression, and this component fits with NICE guidance for  
52  
53  
54  
55  
56  
57  
58  
59  
60

1  
2  
3 treatment of depression in people with physical health problems, as it proposes that  
4  
5 individuals with depression and physical health problems start on low intensity treatments,  
6  
7 including guided self-help and physical activation.<sup>16</sup> In addition, a recent process evaluation  
8  
9 reports that patients who have received BA for depression perceive it as leading to both  
10  
11 cognitive and behavioural changes, which they view as not only improving their symptoms  
12  
13 but also their lives more broadly.<sup>28</sup> In terms of care coordination, whilst our findings suggest  
14  
15 psychological care should be embedded within cardiac rehabilitation programmes, some  
16  
17 patients had benefited from being referred to other services and this did give patients greater  
18  
19 treatment choice. Lastly, the intervention was developed and revised in response to  
20  
21 comments from patients and nurses involved in the feasibility study that preceded the  
22  
23 CADENCE pilot trial.<sup>29</sup> Thus, EPC is more likely than other interventions to be acceptable  
24  
25 to patients and nurses, although findings from the pilot trial showed it remained too  
26  
27 burdensome for nurses to deliver long-term.  
28  
29  
30

### 31 ***Study strengths and weakness***

32  
33 The relatively small number of patients and nurses recruited to the trial limited who could be  
34  
35 approached for interview and thus the possibility of sampling individuals purposefully to  
36  
37 ensure maximum variation within the sample in relation to participant characteristics. This  
38  
39 means we cannot be confident that data saturation was reached. It also means certain groups  
40  
41 of individuals are not represented, e.g. none of the patients interviewed were from an ethnic  
42  
43 minority. This might limit generalisability of the findings to the wider population of patients  
44  
45 or nurses using cardiac rehabilitation services in the UK. However, we interviewed patients  
46  
47 from seven different teams and nurses from four of the five participating intervention teams.  
48  
49 As many of the key findings were evident across the interviews, there is little reason to think  
50  
51 the findings reported here would not be relevant to other cardiac rehabilitation programmes.  
52  
53  
54

### 55 ***Conclusions and implications***

1  
2  
3 Both patients and nurses highly value psychological support being delivered by nurses within  
4 cardiac rehabilitation programmes, but time and resource constraints raise significant barriers  
5 in terms of implementation, so alternative approaches need to be considered. Given that  
6 nurses viewed provision within rehabilitation programmes as ideal, and mentioned good  
7 relations with local IAPT services, an alternative approach could be nurses co-ordinating  
8 IAPT-trained psychological wellbeing practitioners to provide psychological support within  
9 cardiac programmes. In terms of treatment offered, it could include BA, as this was viewed  
10 as potentially effective by patients and nurses, and is a treatment that can be successfully  
11 delivered by junior mental health workers.<sup>18</sup>

### 22 **Acknowledgements**

23  
24 We would like to thank all the nurses and patients who agreed be interviewed as part of their  
25 involvement in the CADENCE pilot trial. We would also like to acknowledge members of  
26 the CADENCE team who are not authors on this paper but were involved in the CADENCE  
27 pilot trial and supported the qualitative work: Professor Rob Anderson, Mrs Antoinette  
28 Davey, Professor Andrew Gibson, Dr David Kessler, Mr Luke Knight, Professor Willem  
29 Kuyken, Professor Rod Taylor, Dr Obioha Ukoumunne, Dr Fiona Warren, Ms Julie Chudley,  
30 and Dr Christine Wright.

### 40 **Contributors**

41  
42 KT was the principal investigator for the qualitative work nested within the CADENCE study  
43 and led on writing this manuscript. RW conducted and analysed the interviews on which the  
44 paper is based. JC was chief investigator for the CADENCE study, and SR the scientific  
45 lead. DR, CD, and MG were other members of the CADENCE team. All authors  
46 contributed to editing of the final manuscript and the refining of its intellectual content.

### 54 **Funding**

1  
2  
3 This work was funded by the UK NIHR Health Technology Assessment Programme (project  
4 number 12/189/06). The views and opinions expressed in this paper are those of the authors  
5 and do not necessarily reflect those of the Health Technology Assessment Programme,  
6  
7  
8  
9  
10 NIHR, NHS or the Department of Health.

### 11 **Competing interests**

12  
13  
14 We have read and understood BMJ policy on declaration of interests and declare that we have  
15 no competing interests.  
16

### 17 **Data sharing statement**

18  
19  
20 The datasets analysed during the current study are not publicly available, as participants were  
21 not asked to consent to this at the time of data collection. However, if requests for data  
22 sharing are made, the University of Bristol Data Access Committee will consider them and  
23  
24  
25  
26  
27  
28  
29  
30  
31  
32  
33  
34  
35  
36  
37  
38  
39  
40  
41  
42  
43  
44  
45  
46  
47  
48  
49  
50  
51  
52  
53  
54  
55  
56  
57  
58  
59  
60  
decide whether or not they can be met.

### 30 **References**

- 31  
32 1. Thombs BD, Ziegelstein RC, Pilote L, *et al.* Somatic symptom overlap in Beck Depression  
33 Inventory-II scores following myocardial infarction. *Br J Psychiatry* 2010;197:61-6.
- 34  
35 2. Singleton N, Bumpstead R, O'Brien M, *et al.* *Psychiatric morbidity among adults living in*  
36 *private households, 2000*. London:HMSO, 2001.
- 37  
38 3. Barth J, Schumacher M, Herrmann-Lingen C. Depression as a risk factor for  
39 mortality in patients with coronary heart disease: A meta-analysis. *Psychosom Med*  
40 2004;66:802-13.
- 41  
42 4. Nicholson A, Kuper H, Hemingway H. Depression as an aetiologic and prognostic factor  
43 in coronary heart disease: a meta-analysis of 6362 events among 146538 participants in 54  
44 observational studies. *Eur Heart J* 2006;27:2763-74.
- 45  
46 5. van Melle JP, de Jonge P, Spijkerman TA, *et al.* Prognostic association of depression  
47 following myocardial infarction with mortality and cardiovascular events: a meta-analysis.  
48 *Psychosom Med* 2004;66:814-22.  
49  
50  
51  
52  
53  
54  
55  
56  
57  
58  
59  
60



- 1  
2  
3 6. Meijer A, Conradi HJ, Bos EH, Thombs BD, van Melle JP, de Jonge P. Prognostic  
4 association of depression following myocardial infarction with mortality and cardiovascular  
5 events: a meta-analysis of 25 years of research. *Gen Hosp Psychiatry* 2011;33:203-16.  
6  
7  
8  
9 7. Gale CR, Batty GD, Osborn DPJ, Tynelius P, Rasmussen F. Mental disorders across the  
10 adult life course and future coronary heart disease evidence for general susceptibility.  
11 *Circulation* 2014;129:186-93.  
12  
13  
14 8. British Association for Cardiovascular Prevention and Rehabilitation. *The BACPR*  
15 *Standards and Core Components for Cardiovascular Disease Prevention and Rehabilitation*  
16 *2012*. London:2012.  
17  
18  
19 9. Piepoli M, Corra U, Adamopoulos S, *et al*. Secondary prevention in the clinical  
20 management of patients with cardiovascular diseases. Core components, standards and  
21 outcome measures for referral and delivery: a policy statement from the cardiac rehabilitation  
22 section of the European Association for Cardiovascular Prevention & Rehabilitation.  
23 Endorsed by the Committee for Practice Guidelines of the European Society of Cardiology.  
24 *Eur J Prev Cardiol* 2014;21:664-81.  
25  
26  
27  
28  
29 10. Lichtman JH, Froelicher ES, Blumenthal JA, *et al*. Depression as a risk factor for poor  
30 prognosis among patients with acute coronary syndrome: Systematic review and  
31 recommendations. A scientific statement from the American Heart Association. *Circulation*  
32 2014;129:1350-69.  
33  
34  
35  
36  
37 11 National Audit of Cardiac Rehabilitation (NACR): *Annual statistical report*.  
38 London:British Heart Foundation, 2016.  
39  
40  
41 12. Simmonds RL, Tylee A, Walters P, Rose D. Patients' perceptions of depression and  
42 coronary heart disease: a qualitative UPBEAT-UK study. *BMC Fam Pract* 2013;14:38.  
43 doi:10.1186/1471-2296-14-38.  
44  
45  
46 13. Paquet M, Bolduc N, Xhignesse M, Vanasse A. Re-engineering cardiac rehabilitation  
47 programmes: considering the patient's point of view. *J Adv Nurs* 2005;51:567-576  
48  
49  
50 14. Richards S, Dickens C, Anderson R, Richards DA, Taylor R; Ukoumunne O, Kessler D,  
51 Turner K, Kuyken W, Gandhi M, Knight L, Gibson A, Davey, A, Warren F, Winder R,  
52 Wright C, Campbell J. Assessing the effectiveness of enhanced psychological care for  
53 patients with depressive symptoms attending cardiac rehabilitation compared with treatment  
54  
55  
56  
57  
58  
59  
60

- 1  
2  
3 as usual (CADENCE): A study protocol for a pilot cluster randomised controlled trial and  
4 qualitative interview study. *Trials* 2016;17:59. doi:10.1186/s13063-016-1184-9.
- 5  
6  
7 15. National Institute for Health and Clinical Excellence. *The treatment and management of*  
8 *depression in adults (Clinical Guideline 90)*. London: NICE, 2009.
- 9  
10  
11 16. National Institute for Health and Clinical Excellence. *Depression in adults with a chronic*  
12 *physical health problem: treatment and management (Clinical Practice Guideline No 91)*.  
13 London: NICE, 2009.
- 14  
15  
16 17. Jacobson NS, Martell CR, Dimidjian S. Behavioral Activation Treatment for Depression:  
17 Returning to Contextual Roots. *Clin Psychol Sci Prac* 2001;8:255-70.
- 18  
19  
20 18. Richards DA, Ekers D, McMillan D, *et al*. Cost and Outcome of Behavioural Activation  
21 versus Cognitive Behavioural Therapy for Depression (COBRA): a randomised, controlled,  
22 non-inferiority trial. *Lancet* 2016;388:871-880.
- 23  
24  
25 19. Kroenke K, Spitzer RL, Williams JB. The PHQ-9: validity of a brief depression severity  
26 measure. *J Gen Intern Med* 2001;16:606-13.
- 27  
28  
29 20. Sturges JE, Hanrahan KJ. Comparing Telephone and Face-to-Face Qualitative  
30 Interviewing: a Research Note. *Qual Res* 2004;4:107-18.
- 31  
32  
33 21. Ritchie J and Spencer L. in Bryman A, Burgess RG (eds). *Analyzing Qualitative Data*.  
34 London: Routledge, 1994:173-194.
- 35  
36  
37 22. Zigmond AS, Snaith RP. The hospital anxiety and depression scale. *Acta Psychiatr Scand*  
38 1983;67:361-70.
- 39  
40  
41 23. Myocardial Ischaemia National Audit Project. *How the NHS cares for patients with heart*  
42 *attack. Annual Public Report April 2014 – March 2015*. London:University College London,  
43 2017.
- 44  
45  
46 24. Barley EA, Walters P, Tylee A, Murray J. General practitioners' and practice nurses'  
47 views and experience of managing depression in coronary heart disease: a qualitative  
48 interview study. *BMC Fam Pract* 2012, 13:1.
- 49  
50  
51 25. Coventry P, Small N, Panagioti M, Adeyemi I, Bee P. Living with complexity;  
52 marshalling resources: a systematic review and qualitative meta-synthesis of lived experience  
53 of mental and physical multimorbidity. *BMC Fam Pract* 2015;16:171.
- 54  
55  
56  
57  
58  
59  
60

- 1  
2  
3 26. Mercer SW, Gunn J, Bower P, Wyke S, Guthrie B. Managing patients with mental and  
4 physical multimorbidity. Changes are needed in policy, research, and practice. *BMJ*  
5 2012;345:e5559.  
6  
7  
8 27. Blumenthal JA, Sherwood A, Smith PJ *et al.* Enhancing cardiac rehabilitation with stress  
9 management training: a randomized clinical efficacy trial. *Circulation* 2016;135. doi:  
10 10.1161/CIRCULATIONAHA.115.018926.  
11  
12  
13 28. Finning K, Richards DA, Moore L, *et al.* Cost and outcome of behavioural activation  
14 versus cognitive behavioural therapy for depression (COBRA): a qualitative process  
15 evaluation. *BMJ* 2017;7:e014161.  
16  
17  
18 29. Winder R, Richards SH, Campbell JL, *et al.* Development and refinement of a complex  
19 intervention within cardiac rehabilitation services: experiences from the CADENCE  
20 feasibility study. *Pilot and Feasibility Stud* 2017;3:9.  
21  
22  
23  
24  
25  
26  
27  
28  
29  
30  
31  
32  
33  
34  
35  
36  
37  
38  
39  
40  
41  
42  
43  
44  
45  
46  
47  
48  
49  
50  
51  
52  
53  
54  
55  
56  
57  
58  
59  
60

### Consolidated criteria for reporting qualitative studies (COREQ): 32-item checklist

| No. Item                                       | Guide questions/description                                                                                                                              | Reported on Page #                                                                                                                                     |
|------------------------------------------------|----------------------------------------------------------------------------------------------------------------------------------------------------------|--------------------------------------------------------------------------------------------------------------------------------------------------------|
| <b>Domain 1: Research team and reflexivity</b> |                                                                                                                                                          |                                                                                                                                                        |
| <i>Personal Characteristics</i>                |                                                                                                                                                          |                                                                                                                                                        |
| 1. Interviewer/facilitator                     | Which author/s conducted the interviews?                                                                                                                 | Page 7 and 8: RW conducted the interviews.                                                                                                             |
| 2. Credentials                                 | What were the researcher's credentials? E.g. PhD, MD                                                                                                     | BSc, RGN.                                                                                                                                              |
| 3. Occupation                                  | What was their occupation at the time of the study?                                                                                                      | Research Fellow.                                                                                                                                       |
| 4. Gender                                      | Was the researcher male or female?                                                                                                                       | Female.                                                                                                                                                |
| 5. Experience and training                     | What experience or training did the researcher have?                                                                                                     | Page 7: 'RW, a researcher with over 10 years' experience of conducting qualitative research'                                                           |
| <i>Relationship with participants</i>          |                                                                                                                                                          |                                                                                                                                                        |
| 6. Relationship established                    | Was a relationship established prior to study commencement?                                                                                              | Page 8: RW was known to the nurses, as she had observed the two training days.                                                                         |
| 7. Participant knowledge of the interviewer    | What did the participants know about the researcher? e.g. personal goals, reasons for doing the research                                                 | Participants were told that RW was the researcher employed on the study to conduct the qualitative work.                                               |
| 8. Interviewer characteristics                 | What characteristics were reported about the interviewer/facilitator? e.g. Bias, assumptions, reasons and interests in the research topic                | None were reported.                                                                                                                                    |
| <b>Domain 2: study design</b>                  |                                                                                                                                                          |                                                                                                                                                        |
| <i>Theoretical framework</i>                   |                                                                                                                                                          |                                                                                                                                                        |
| 9. Methodological orientation and Theory       | What methodological orientation was stated to underpin the study? e.g. grounded theory, discourse analysis, ethnography, phenomenology, content analysis | The study drew on the principles of grounded theory in terms of insights from earlier data collection informing the focus of later interviews (page 8) |

|                                  |                                                                                          |                                                                                                                                                                                                                                                                                                                                      |
|----------------------------------|------------------------------------------------------------------------------------------|--------------------------------------------------------------------------------------------------------------------------------------------------------------------------------------------------------------------------------------------------------------------------------------------------------------------------------------|
| <i>Participant selection</i>     |                                                                                          |                                                                                                                                                                                                                                                                                                                                      |
| 10. Sampling                     | How were participants selected?<br>e.g. purposive, convenience,<br>consecutive, snowball | Page 7: we explain that, ‘as it took longer than expected to recruit patients to the trial, in the end, all 15 EPC patients and 6 of the UC patients were approached for interview.<br><br>Page 8: we explain that all the nurses from the four intervention teams who recruited patients were interviewed.                          |
| 11. Method of approach           | How were participants approached? e.g. face-to-face, telephone, mail, email              | We explain (page 6) that all patients and nurses involved in the trial, at the time of being recruited to the study, agreed to their details being passed onto the qualitative research team so they could be approached for interview.<br><br>In terms of approaches used, RW contacted patients by telephone, and nurses by email. |
| 12. Sample size                  | How many participants were in the study?                                                 | 18 patients (page 7) and 7 nurses (page 8) were interviewed.                                                                                                                                                                                                                                                                         |
| 13. Non-participation            | How many people refused to participate or dropped out?<br>Reasons?                       | Page 7: we explain that ‘Two of the EPC patients approached for interview were uncontactable and another EPC patient declined to be interviewed’.                                                                                                                                                                                    |
| <i>Setting</i>                   |                                                                                          |                                                                                                                                                                                                                                                                                                                                      |
| 14. Setting of data collection   | Where was the data collected?<br>e.g. home, clinic, workplace                            | We explain both patients and nurses were interviewed either face-to-face or by telephone (page 7 and 8).                                                                                                                                                                                                                             |
| 15. Presence of non-participants | Was anyone else present besides the participants and researchers?                        | No.                                                                                                                                                                                                                                                                                                                                  |
| 16. Description of sample        | What are the important characteristics of the sample? e.g. demographic data, date        | On page 7, we report patients’ gender, ethnicity, mean age and pre-treatment                                                                                                                                                                                                                                                         |

|                                        |                                                                               |                                                                                                                                                                                                 |
|----------------------------------------|-------------------------------------------------------------------------------|-------------------------------------------------------------------------------------------------------------------------------------------------------------------------------------------------|
|                                        |                                                                               | PHQ-9 score. We also detail what cardiac events patients reported. On page 8, we state all the nurses interviewed were female.                                                                  |
| <i>Data collection</i>                 |                                                                               |                                                                                                                                                                                                 |
| 17. Interview guide                    | Were questions, prompts, guides provided by the authors? Was it pilot tested? | We explain on pages 7 and 8 topic guides were used. The guides were not pilot tested.                                                                                                           |
| 18. Repeat interviews                  | Were repeat interviews carried out? If yes, how many?                         | No                                                                                                                                                                                              |
| 19. Audio/visual recording             | Did the research use audio or visual recording to collect the data?           | We explain on page 8 all the interviews were audio-recorded.                                                                                                                                    |
| 20. Field notes                        | Were field notes made during and/or after the interview or focus group?       | Field notes were taken immediately after each interview.                                                                                                                                        |
| 21. Duration                           | What was the duration of the interviews or focus group?                       | Length of the interviews is provided on page 8                                                                                                                                                  |
| 22. Data saturation                    | Was data saturation discussed?                                                | Data saturation is mentioned in Discussion, page 20.                                                                                                                                            |
| 23. Transcripts returned               | Were transcripts returned to participants for comment and/or correction?      | No.                                                                                                                                                                                             |
| <b>Domain 3: analysis and findings</b> |                                                                               |                                                                                                                                                                                                 |
| <i>Data analysis</i>                   |                                                                               |                                                                                                                                                                                                 |
| 24. Number of data coders              | How many data coders coded the data?                                          | We explain on page 8, two researchers coded data.                                                                                                                                               |
| 25. Description of the coding tree     | Did authors provide a description of the coding tree?                         | No.                                                                                                                                                                                             |
| 26. Derivation of themes               | Were themes identified in advance or derived from the data?                   | On page 8, we have written 'Initially, KMT and RW independently read a sample of nurse and patient transcripts in order to identify emerging themes and to develop a preliminary coding frame.' |
| 27. Software                           | What software, if applicable, was used to manage the data?                    | We state on page 9 'transcripts were manually coded and data pertaining to each code summarised in tables using an approach based on framework                                                  |

|                                  |                                                                                                                                 |                                                                                                                                                                                                       |
|----------------------------------|---------------------------------------------------------------------------------------------------------------------------------|-------------------------------------------------------------------------------------------------------------------------------------------------------------------------------------------------------|
|                                  |                                                                                                                                 | analysis'                                                                                                                                                                                             |
| 28. Participant checking         | Did participants provide feedback on the findings?                                                                              | No.                                                                                                                                                                                                   |
| <i>Reporting</i>                 |                                                                                                                                 |                                                                                                                                                                                                       |
| 29. Quotations presented         | Were participant quotations presented to illustrate the themes/findings? Was each quotation identified? e.g. participant number | Quotes have been used in the Results section and, as explained on page 9, 'according to whether a patient or nurse is being quoted, and using the interviewee's assigned identification (ID) number.' |
| 30. Data and findings consistent | Was there consistency between the data presented and the findings?                                                              | Yes                                                                                                                                                                                                   |
| 31. Clarity of major themes      | Were major themes clearly presented in the findings?                                                                            | Yes                                                                                                                                                                                                   |
| 32. Clarity of minor themes      | Is there a description of diverse cases or discussion of minor themes?                                                          | We have indicated when a view was expressed by just one individual, e.g. page 9, 11, 13                                                                                                               |

# BMJ Open

## Patients and nurses' views on providing psychological support within cardiac rehabilitation programmes: a qualitative study

|                                 |                                                                                                                                                                                                                                                                                                                                                                                                                                                                                                                                                                                                                                        |
|---------------------------------|----------------------------------------------------------------------------------------------------------------------------------------------------------------------------------------------------------------------------------------------------------------------------------------------------------------------------------------------------------------------------------------------------------------------------------------------------------------------------------------------------------------------------------------------------------------------------------------------------------------------------------------|
| Journal:                        | <i>BMJ Open</i>                                                                                                                                                                                                                                                                                                                                                                                                                                                                                                                                                                                                                        |
| Manuscript ID                   | bmjopen-2017-017510.R1                                                                                                                                                                                                                                                                                                                                                                                                                                                                                                                                                                                                                 |
| Article Type:                   | Research                                                                                                                                                                                                                                                                                                                                                                                                                                                                                                                                                                                                                               |
| Date Submitted by the Author:   | 11-Jul-2017                                                                                                                                                                                                                                                                                                                                                                                                                                                                                                                                                                                                                            |
| Complete List of Authors:       | Turner, Katrina; University of Bristol, School of Social and Community Medicine; The National Institute for Health Research Collaboration for Leadership in Applied Health Research and Care West (NIHR CLAHRC West)<br>Winder, Rachel; University of Exeter Medical School<br>Campbell, John; University of Exeter, Primary Care;<br>Richards, David; University of Exeter, Medical School<br>Gandhi, Manish; Royal Devon and Exeter NHS Foundation Trust<br>Dickens, Chris; University of Exeter, University of Exeter Medical School<br>Richards, Suzanne; 2University of Exeter Medical School; Leeds Institute of Health Research |
| <b>Primary Subject Heading</b>: | Mental health                                                                                                                                                                                                                                                                                                                                                                                                                                                                                                                                                                                                                          |
| Secondary Subject Heading:      | Cardiovascular medicine, Qualitative research, Rehabilitation medicine                                                                                                                                                                                                                                                                                                                                                                                                                                                                                                                                                                 |
| Keywords:                       | depression, cardiac rehabilitation, QUALITATIVE RESEARCH, psychological support                                                                                                                                                                                                                                                                                                                                                                                                                                                                                                                                                        |
|                                 |                                                                                                                                                                                                                                                                                                                                                                                                                                                                                                                                                                                                                                        |

SCHOLARONE™  
Manuscripts



1  
2  
3 **Patients and nurses' views on providing psychological support within cardiac**  
4  
5 **rehabilitation programmes: a qualitative study**  
6  
7

8  
9  
10 **Corresponding author**

11 Katrina M Turner

12  
13 School of Social and Community Medicine, University of Bristol, Canynge Hall, 39 Whatley  
14 Road, Bristol, BS8 2PS.  
15

16  
17 The National Institute for Health Research Collaboration for Leadership in Applied Health  
18 Research and Care West (NIHR CLAHRC West) at University Hospitals Bristol NHS  
19 Foundation Trust.  
20

21 Katrina.turner@bristol.ac.uk, 0117 331 4559  
22  
23  
24

25  
26  
27  
28  
29 **Co-authors**

30 Rachel Winder, University of Exeter Medical School, Exeter, UK

31 John Campbell, University of Exeter Medical School, Exeter, UK

32 David A Richards, University of Exeter Medical School, Exeter, UK

33 Manish Gandhi, Royal Devon and Exeter NHS Foundation Trust, Exeter, UK

34 Chris Dickens, University of Exeter Medical School, Exeter, UK

35  
36 Suzanne Richards, University of Exeter Medical School, Exeter, UK; Leeds Institute of  
37 Health Research, Leeds, UK  
38  
39  
40  
41  
42  
43  
44  
45  
46  
47  
48  
49  
50  
51  
52  
53  
54  
55  
56  
57  
58  
59  
60

## Abstract

**Objective:** To explore patients and nurses' views on the feasibility and acceptability of providing psychological care within cardiac rehabilitation services.

**Design:** In-depth interviews analysed thematically.

**Participants:** 18 patients and 7 cardiac nurses taking part in a pilot trial (CADENCE) of an enhanced psychological intervention (EPC) delivered within cardiac rehabilitation programmes by nurses to patients with symptoms of depression.

**Setting:** Cardiac services based in the South West of England and the East Midlands, UK.

**Results:** Patients and nurses viewed psychological support as central to good cardiac rehabilitation. Patients' accounts highlighted the significant and immediate adverse effect a cardiac event can have on an individual's mental wellbeing. They also showed that patients valued nurses attending to both their mental and physical health, and felt this was essential to their overall recovery. Nurses were committed to providing psychological support, believed it benefited patients, and advocated for this support to be delivered within cardiac rehabilitation programmes rather than within a parallel health care service. However, nurses were time-constrained and found it challenging to provide psychological care within their existing workloads.

**Conclusions:** Both patients and nurses highly value psychological support being delivered within cardiac rehabilitation programmes but resource constraints raise barriers to implementation. Consideration, therefore, should be given to alternative forms of delivery which do not rely solely upon nurses to enable patients to receive psychological support during cardiac rehabilitation.

**Trial registration:** ISCTRN34701576, 29 May 2014.

**Strengths and limitations of this study**

- This is the first study to detail both patients and nurses' views on providing psychological care within cardiac rehabilitation services.
- Interviews were held with patients receiving care in 7 different cardiac rehabilitation teams, and with nurses from four of these teams.
- Employing in-depth interviews ensured interviewees could raise issues that were salient to them and not predicted by the research team.
- The relatively small number of patients and nurses recruited to the CADENCE pilot trial limited the number of interviews that could be conducted, and the extent to which individuals could be purposefully sample to ensure maximum variation within the sample.
- The views expressed by interviewees about the provision of psychological care within cardiac rehabilitation services may have been influenced by their experiences of the CADENCE trial.

## Background

About 20% of individuals with coronary heart disease (CHD) report symptoms of depression.<sup>1</sup> This proportion is approximately four times greater than the levels identified within the general population.<sup>2</sup> Depression among patients with CHD is associated with greater risk of subsequent cardiac morbidity and mortality.<sup>3-7</sup> Reasons for this association remain unclear but possible mechanisms include the association between depression and cardiac risk factors (e.g. hypertension, smoking, reduced physical activity), greater coronary disease severity, treatment non-adherence to cardiac medication and rehabilitation programmes, and increased platelet aggregation.<sup>8,9</sup> There is national and international recognition that the detection and treatment of depression among these patients is important.<sup>10-12</sup>

Routine clinical care for patients with CHD who have experienced acute coronary syndrome includes the provision of cardiac rehabilitation. The British Association for Cardiovascular Prevention and Rehabilitation's (BACPR) guidance<sup>10</sup> states that usual cardiac rehabilitation should include psychological support. The majority of people attending cardiac rehabilitation in the UK, however, do not receive psychological care.<sup>13</sup>

Cardiac rehabilitation programmes usually involve an initial assessment followed by a structured programme that lasts between 6 to 8 weeks. This programme may include clinic appointments where patients' cardiac symptoms are monitored and discussed, supervised exercise sessions and educational talks. Programmes are delivered primarily by cardiac nurse specialists, who are supported by physiotherapists. In terms of how nurses can best provide psychological support to patients undergoing rehabilitation, possible models include them delivering psychological support within the structured programme, referring patients onto other mainstream health services providing treatment for depression, and/or external mental

1  
2  
3 health practitioners working closely with cardiac nurses to deliver psychological care to their  
4  
5 patients. It is not known which approach would be most acceptable to patients and nurses.  
6

7  
8 Little is known about patients and nurses' views and experiences of receiving/delivering  
9  
10 psychological support within cardiac rehabilitation programmes. Simmonds et al<sup>14</sup> explored  
11  
12 patients' views and experiences of living with depression and CHD, and Paquet et al<sup>15</sup>  
13  
14 assessed patients' experiences of care received during the first three months following a  
15  
16 cardiac event requiring hospitalisation, but neither study explored patients' views of any  
17  
18 formal psychological support they had received during their rehabilitation, nor how they  
19  
20 thought this care should be given. To date, no study has documented cardiac nurses' views of  
21  
22 this area.  
23

24  
25 The recently completed CADENCE study developed and piloted an enhanced psychological  
26  
27 care (EPC) intervention for patients presenting with depressive symptoms following a cardiac  
28  
29 event who attended cardiac rehabilitation.<sup>16</sup> EPC was delivered by cardiac nurse specialists,  
30  
31 within their existing workloads and embedded within the structured cardiac rehabilitation  
32  
33 programme. It consisted of mental health care coordination and a patient led, nurse supported  
34  
35 programme of behavioural activation (BA). The care co-ordination aspect of the intervention  
36  
37 was based on current NICE guidance.<sup>17,18</sup> BA is a simple psychological treatment for  
38  
39 depression that aims to re-engage patients with positively reinforcing experiences and reduce  
40  
41 avoidance behaviours.<sup>19</sup> It is no less clinically effective but more cost effective than  
42  
43 cognitive behavioural therapy in treating depression in adults.<sup>20</sup>  
44  
45

46  
47 The CADENCE study included a feasibility study and external pilot cluster randomized  
48  
49 controlled trial. As part of the pilot trial, in-depth interviews were held with patients and with  
50  
51 nurses who, as part of the study, had been trained to deliver EPC. They explored patients and  
52  
53 nurses' views on the provision of psychological support within cardiac rehabilitation  
54  
55 programmes and, where appropriate, their experiences of receiving/implementing EPC. This  
56  
57  
58  
59  
60

1  
2  
3 paper details findings from these interviews. It reports patients and nurses' views on the  
4  
5 feasibility and acceptability of providing psychological care within cardiac rehabilitation  
6  
7 services, reflecting on how such care could be most appropriately delivered in the future.  
8

## 9 **Methods**

### 10 *The CADENCE pilot trial*

11  
12  
13  
14 Twenty cardiac rehabilitation teams were approached to take part in the pilot trial between  
15  
16 December 2014 and February 2015. Eight teams agreed to participate. They were based in  
17  
18 the South West of England or the East Midlands. Five of the participating teams were  
19  
20 randomised to EPC and three to usual care (UC). Nurses in all 8 participating teams were  
21  
22 responsible for screening and recruiting patients.  
23

24  
25 Patients were eligible to take part if they were 18 years old or over, referred for cardiac  
26  
27 rehabilitation based on local clinical referral protocols and scored ten or more on the Patient  
28  
29 Health Questionnaire-9 (PHQ-9).<sup>21</sup> Patients were not eligible if they reported being treated  
30  
31 for depression in the six months before their acute cardiac event; if there was evidence of  
32  
33 alcohol or drug dependency; where the participant was acutely suicidal; or where there was  
34  
35 evidence of poorly controlled bipolar disorder or psychosis/psychotic symptoms.  
36  
37

38  
39 Eleven cardiac rehabilitation nurses working in the five intervention teams were trained, over  
40  
41 two days, in how to deliver EPC. The training covered mental health care coordination, how  
42  
43 to support patients working with a BA self-help manual, assessment and management of  
44  
45 psychiatric risk, and how to use the CADENCE materials, e.g. the clinical materials to be  
46  
47 used during BA sessions. Whilst delivering EPC to patients, each nurse received clinical  
48  
49 supervision every fortnight from an accredited BA therapist. This was held by telephone,  
50  
51 either on an individual basis or in conjunction with other study nurses within their own team.  
52  
53  
54 In order to assess treatment fidelity, nurses were asked to complete a structured form after  
55  
56 delivering EPC to patients. This form had been developed by the research team and invited  
57  
58  
59  
60

1  
2  
3 nurses to record which elements of the EPC intervention they had delivered. These notes  
4  
5 were reviewed by members of the research team, alongside feedback from the clinical  
6  
7 supervision sessions. Based on this information, the research team concluded that the nurses  
8  
9 had delivered EPC as intended.

10  
11 Seven of the participating teams managed to recruit patients to the trial. In total, 29 patients  
12  
13 were recruited (15 EPC and 14 UC). All patients and nurses involved in the trial, at the time  
14  
15 of being recruited to the study, agreed to their contact details being passed onto the  
16  
17 qualitative research team so they could be approached for interview.  
18  
19

### 20 ***Patient and nurse interviews***

21  
22 Patients were interviewed once they had completed their five month follow-up in the trial, in  
23  
24 case the interview influenced their views of the intervention or the study. Also, by this time,  
25  
26 most individuals had completed their cardiac rehabilitation. The intention was to  
27  
28 purposefully sample interviewees on the basis of age, gender, recruiting team and, in the case  
29  
30 of the EPC participants, adherence to EPC. However, as it took longer than expected to  
31  
32 recruit patients to the trial, in the end, all 15 EPC patients and 6 of the UC patients were  
33  
34 approached for interview.  
35  
36

37  
38 Two of the EPC patients approached were uncontactable and another EPC patient declined to  
39  
40 be interviewed. Thus, interviews were held with a total of 18 patients (12 EPC and 6 UC).  
41  
42 These interviewees were recruited across the seven participating teams who had recruited  
43  
44 patients to the trial. Patients were interviewed by RW, a researcher with over 10 years'  
45  
46 experience of conducting qualitative research, between January and June 2016. The initial  
47  
48 two interviews were held on a face-to-face basis. The remaining interviews were held by  
49  
50 telephone, as interviewees were based across a large geographical area and because well  
51  
52 planned telephone interviews can gather the same material as interviews held face-to-face.<sup>22</sup>  
53  
54

55  
56 The two individuals interviewed in person provided written consent to take part at the time of  
57  
58  
59  
60

1  
2  
3 interview. Individuals interviewed over the telephone were posted a consent form and asked  
4  
5 to complete and return it to RW, using a pre-paid envelope, prior to interview.  
6

7  
8 A topic guide was used to ensure consistency across the interviews. It was based on the aims  
9  
10 of the research, a review of relevant literature, and the researchers' knowledge of cardiac  
11  
12 rehabilitation and the intervention. Two versions of the guide were used: one for the EPC  
13  
14 arm and one for the UC arm. Both included questions about the patient's cardiac event,  
15  
16 experience of cardiac rehabilitation, mental wellbeing during treatment, and relationship with  
17  
18 the cardiac nurse. The version used with the EPC arm also included questions about  
19  
20 experience of EPC and treatment adherence.  
21

22  
23 Eight of the eighteen patients interviewed were male and all the interviewees reported their  
24  
25 ethnicity as White British. The mean age of interviewees was 67.0 (age range 50-79 years)  
26  
27 and their average pre-treatment PHQ-9 score was 13.9. Cardiac events reported by the  
28  
29 patients included heart attacks, angina, cardiomyopathy, heart failure and valve disorder  
30  
31 treated through coronary artery bypass grafts, stent insertion, valve replacement, medication  
32  
33 or a combination of these. All interviewees had started their cardiac rehabilitation  
34  
35 programme and attended at least one cardiac nurse appointment. The interviews with EPC  
36  
37 patients on average lasted longer than those held with UC patients (52 minutes versus 32  
38  
39 minutes).  
40  
41

42  
43 Seven nurses (all female) from four of the five intervention teams were interviewed. No  
44  
45 nurses from the fifth team were interviewed as this team did not recruit any patients. Nurses  
46  
47 were interviewed once they had delivered EPC to one or more patients. A topic guide was  
48  
49 used and covered the following areas: experience of delivering EPC, dealing with patients at  
50  
51 risk of suicide or self-harm, and impact of delivering psychological care on their relationship  
52  
53 with patients.  
54  
55  
56  
57  
58  
59  
60



1  
2  
3 The nurse interviews were held by RW between December 2015 and March 2016. RW was  
4 known to the nurses, as she had observed the two training days. The first three nurse  
5 interviews were conducted in person. The remaining four were held by telephone, as these  
6 nurses were geographically dispersed. As in the case of the patient interviews, nurses  
7 provided written consent to be interviewed at the time of interview, or completed and  
8 returned a consent form prior to interview, depending on whether they were interviewed in  
9 person or over the telephone. At the time of interview, each nurse had delivered EPC to  
10 between one and four patients. The interviews lasted between 38 to 64 minutes.

11  
12 Ethical approval to conduct the pilot trial and the qualitative work nested within it, was given  
13 by NRES Committee South West – Exeter (reference: 14/SW/0139).

#### 14 15 16 17 18 19 20 21 22 23 24 25 26 27 28 29 30 31 32 33 34 35 36 37 38 39 40 41 42 43 44 45 46 47 48 49 50 51 52 53 54 55 56 57 58 59 60

*Data analysis*

Data collection and analysis proceeded in parallel, so that early insights could inform the focus of later interviews. Both patient and nurse interviews were audio recorded and fully transcribed. Both interview sets were analysed thematically, as this allowed comparisons to be made within and across the interviews and highlighted patient and nurse views towards specific issues, e.g. the feasibility of cardiac nurses providing psychological care.

Initially, KMT and RW independently read a sample of nurse and patient transcripts in order to identify emerging themes and to develop a preliminary coding frame. They then met to discuss their coding. This discussion led to two coding frames being drafted: one for each data set. Where possible, similar codes were used within each coding frame to assist triangulation of nurse and patient accounts. Once the coding frames had been agreed, transcripts were manually coded and data pertaining to each code summarised in tables using an approach based on framework analysis.<sup>23</sup> The researchers then read and re-read the tables to identify key themes and deviant cases, and to highlight similarities and differences between the data sets.

## Results

Analysis of the data highlighted patients and nurses' views on the importance and benefits of providing psychological care within cardiac rehabilitation programmes, indicated the extent to which patients and nurses felt it was acceptable and practical for nurses to provide this care, and identified issues relevant to service planners regarding when, where and how psychological support should be provided in cardiac rehabilitation.

Below, quotes have been reproduced to illustrate key points. They have been tagged according to whether a patient or nurse is being quoted, and using the interviewee's assigned identification (ID) number.

### *The need for psychological support*

Both EPC and UC patients described the significant impact their cardiac event had had on their emotional wellbeing. Most reported experiencing a dramatic loss of self-confidence, panic attacks, sleeplessness, and/or a lack of energy and motivation. One individual stated that he had felt '*mentally and physically shell-shocked*' (EPC, patient 12) and others described how they had been suicidal:

*'It just all came out and I was surprised at myself, to be honest, I had no idea that I was, my overwhelming feeling was disappointment that I'd actually survived and that frightened me because I've never felt that before [suicidal]...' EPC, patient 14*

*'I don't show it [how they feel] ... you feel really drained and really start thinking the worst and what's the easiest way out which is, and then you think "which is the easiest way out tablets or." [speech trailed off]' EPC, patient 9*

The intensity of this emotional response may have been partly due to the fact that patients were aware of the contrast between their former and current self, and what they had lost following their cardiac event:

1  
2  
3 *'It was a horrible, horrible experience, I just felt my life was ebbing away, and I've*  
4 *never felt that low before... I had no go in me, no energy, no focus, horrible, horrible*  
5 *sensation.'* UC, patient 2  
6  
7

8  
9  
10 *'I was angry, frightened, upset... I got very depressed, I lost my job, I loved my job...*  
11 *suddenly everything had been ripped out from under my feet and I got very depressed,*  
12 *very anxious and felt a failure.'* EPC, patient 17  
13  
14  
15

16 Some patients described feeling supported by family and friends, while others detailed how  
17 they had been unable to discuss how they felt with others. In addition, most patients reported  
18 the time between being discharged from hospital to their first cardiac rehabilitation  
19 appointment as particularly difficult. Several patients described feeling lonely as they had  
20 very little or no family around, and others recalled feeling unable to cope after the 'cossetted'  
21 (EPC patient 13) hospital environment and cut 'adrift' (EPC patient 14) from professional  
22 help upon hospital discharge.  
23  
24  
25  
26  
27  
28  
29  
30

31 When focusing on the nurse accounts, it was apparent that all the nurses viewed  
32 psychological care as a core component of cardiac rehabilitation and had provided  
33 psychological support prior to their involvement in CADENCE. Nurses had routinely  
34 screened for depression and anxiety using Hospital Anxiety and Depression Scale (HADS).<sup>24</sup>  
35  
36  
37  
38  
39  
40  
41 In terms of the content of psychological support provided, there was local variation. Most  
42 nurses had provided support by giving talks on stress and relaxation, and some had also  
43 referred patients to their GP or encouraged patients to self-refer to Improving Access to  
44 Psychological Therapies (IAPT) services, which some nurses described as having good  
45 relations with. Interestingly, one nurse's comments implied the psychological aspects of  
46 cardiac rehabilitation could dominate over the physical:  
47  
48  
49  
50  
51  
52

53  
54 *'I've got to be honest, I mean, sometimes I've left a cardiac rehabilitation clinic and*  
55 *all that we have addressed is the psychological side of things.'* Nurse 5  
56  
57  
58  
59  
60

1  
2  
3 Having been asked within the trial to screen patients using the PHQ-9, which includes a  
4 question specifically about suicidal thoughts, nurses became aware that when previously  
5 using the HADS, they might not have identified patients who were at risk:  
6  
7  
8

9  
10 *'Now it's a lot more formalised and I'm more aware of that patient, because before I*  
11 *wasn't picking them up, because I wasn't doing the PHQ-9.'* Nurse 1  
12  
13

14 Some nurses described being surprised by how frequently they now identified patients with  
15 such thoughts, and how completing the questionnaire provided patients with an opportunity  
16 to discuss their mental health which would often *'come a bit out of the blue'* (Nurse 4).  
17  
18  
19

### 20 ***The acceptability and feasibility of nurses providing psychological care***

21 Both EPC and UC patients said they had developed good relationships with their cardiac  
22 nurse and viewed them as someone they could talk to. The UC patients, however, described  
23 how they had not discussed their mental wellbeing with their nurse in any detail, if at all.  
24  
25  
26  
27  
28

29 Interviewer: *'Did the nurse talk to you at all about your anxiety at the time or*  
30 *anything that she could help you with, did she give you a leaflet or did she talk about*  
31 *it?'*  
32  
33  
34  
35

36 UC, patient 1: *'No, no, because I don't expect she knew about it. Unless she knew*  
37 *about it and didn't say nothing. As far as I can remember, it was never ever talked*  
38 *about.'*  
39  
40  
41  
42

43 Three of the UC patients mentioned they would have liked to have spoken to their nurse  
44 about their mental wellbeing, but then implied they had not been given the opportunity to do  
45 so.  
46  
47  
48

49 *'They [the nurses] are doing a brilliant thing, I cannot fault them... but they're very*  
50 *structured, they do what they do to help you and it's a great thing... it's just when you*  
51 *have got anxieties or you're worried about something... it's a shame, I felt that there*  
52 *wasn't enough of the one to one.'* UC, patient 2  
53  
54  
55  
56  
57  
58  
59  
60

1  
2  
3 EPC patients reported receiving EPC before, during or after attending their rehabilitation  
4  
5 fitness session. They had welcomed the opportunity to talk about their emotions, felt  
6  
7 comfortable with their nurse providing both physical and mental support, and were confident  
8  
9 in the nurse's ability to do this. It was also apparent that they valued the focus of their care  
10  
11 encompassing both their mental and physical health:  
12

13  
14 *'It was a good surprise in that I thought the cardiac rehab would just be "Hello! Do*  
15  
16 *a few exercises" and that's it. I thought it was really brilliant, that it was looked at*  
17  
18 *holistically, brilliant. I came out thinking, "oh this is a real breath of fresh air, that*  
19  
20 *people should actually look at me as a total person and not just as a patient with a*  
21  
22 *dodgy heart" sort of thing.'* EPC, patient 13  
23

24  
25 *'To have somebody that deals with the mental health side as well as the physical I*  
26  
27 *think is incredibly important... it shouldn't be just about rehabilitating the body, it*  
28  
29 *should be rehabilitating the mind as well.'* EPC, patient 17  
30  
31

32 EPC patients viewed the one-to-one dedicated time they had had with their nurse to discuss  
33  
34 their mental health as crucial to their physical and mental recovery, and two participants who  
35  
36 had experienced suicidal thoughts described this input as lifesaving:  
37

38  
39 *'Without people like you and [name of nurse] talking to me and me talking to you, I*  
40  
41 *might not be here now.'* EPC, patient 8  
42

43  
44 *'I think a lot of people when they commit suicide and things like that... they just feel*  
45  
46 *useless to everybody and nobody and the good thing with that [EPC] is they do help*  
47  
48 *you... it's certainly helped me.'* EPC, patient 9  
49

50 Talking to a nurse had allowed patients to express how they felt, to better understand why  
51  
52 they felt low, and had encouraged them to talk to others. In addition, EPC patients described  
53  
54 how BA had enabled them to see the link between their mood and certain activities, which in  
55  
56 turn had led to them changing or increasing activities to improve their mood.  
57  
58  
59  
60

1  
2  
3 However, despite valuing the care they had received, some EPC patients commented that  
4 they would have liked more psychological support but were aware of the '*tremendous*  
5 *pressure*' (EPC patient 12) nurses were working under, so felt it would be inappropriate to  
6 ask for more time. Also, not all patients felt nurses were best placed to deal with their mental  
7 health needs. For example, one patient commented that she did not want to talk about mental  
8 health with a 'physical' health practitioner. In addition, several patients mentioned they had  
9 received their EPC session in a corner of the gym or leisure centre because the nurse did not  
10 have access to a private room. Although most participants said they were not worried about  
11 the lack of privacy, one participant described how she felt uncomfortable discussing her  
12 emotions in public.

13  
14 Comments by nurses indicated that they felt capable of providing psychological care. They  
15 described the training they had received as part of CADENCE as covering everything they  
16 needed to know and stated that, with experience, they had found ways to deliver EPC  
17 smoothly. In addition, one nurse commented that patients learnt quickly and implied that as  
18 patients progressed through treatment, less work was involved:

19  
20  
21  
22  
23  
24  
25  
26  
27  
28  
29  
30  
31  
32  
33  
34  
35  
36  
37  
38  
39  
40  
41  
42  
43  
44  
45  
46  
47  
48  
49  
50  
51  
52  
53  
54  
55  
56  
57  
58  
59  
60

*'Within a couple of weeks I think the patients saw very quickly how their mood was related to their activities and they got it very quickly. So after that actually the time spent with them prior to the group was more as you say coordinating them to the next phase ... and actually moving them onto actually allocating routine activities.'* Nurse

2

59  
60  
61  
62  
63  
64  
65  
66  
67  
68  
69  
70  
71  
72  
73  
74  
75  
76  
77  
78  
79  
80  
81  
82  
83  
84  
85  
86  
87  
88  
89  
90  
91  
92  
93  
94  
95  
96  
97  
98  
99  
100

Nurses commented that, having completed the CADENCE training, they felt more able to effectively treat depression and had formalised their approach. They also said they now spent more designated time with patients discussing mental health, which they felt patients valued, and thought BA had encouraged patients to be more physically and socially active. However, nurses described how delivering EPC could be time consuming. An EPC session

1  
2  
3 incorporating the BA component could take between 10 and 40 minutes, and even longer if  
4  
5 the PHQ-9 indicated that the patient was 'at risk'. Time was also needed to receive clinical  
6  
7 supervision and to chase patients who had not attended. The impact of this increased  
8  
9 workload meant nurses shortened their lunch breaks, delayed going home, ran late with other  
10  
11 patients and/or asked a colleague to 'double up' (Nurse 6) so one of them could focus on the  
12  
13 EPC patient while the other took the fitness session.  
14

15  
16 This increase in workload also meant some nurses felt 'lucky' (nurses 1, 2, 6) that they had  
17  
18 not needed to see more than one EPC patient at the same rehabilitation session or on the same  
19  
20 day. One nurse (2) also said it would be 'mind-numbingly brain taxing' to deliver EPC to  
21  
22 more than one person in the same session or on the same day, suggesting nurses would also  
23  
24 have experienced this situation as mentally and emotionally demanding.  
25  
26

27  
28 In addition to having limited time, nurses reported having little or no access to a private room  
29  
30 where they could talk to patients about sensitive issues. Most nurses worked across various  
31  
32 sites, either within their hospital or within the community e.g. leisure centres or health  
33  
34 centres. A lack of space led to nurses asking EPC patients to come early to a rehabilitation  
35  
36 session or to stay on afterwards, and talking to patients in a quiet corner of the fitness room.  
37  
38 The latter situation was viewed as not ideal but perhaps less intimidating for patients than  
39  
40 meeting in a private room.  
41  
42

### 43 ***When and how to provide psychological care for depression***

44  
45 Patients felt that embedding psychological support within cardiac rehabilitation for patients  
46  
47 with symptoms of depression was timely and appropriate. However, some commented they  
48  
49 would also have liked to have commenced such care earlier, either when in hospital following  
50  
51 their cardiac event or immediately following hospital discharge, as they had experienced this  
52  
53 time as particularly difficult. Patients also thought psychological support should be  
54  
55 continued beyond cardiac rehabilitation if it was still needed:  
56  
57  
58  
59  
60

1  
2  
3 *I think additional help after this [end of EPC] is a definite must for some people, it*  
4 *was for me... if they [your nurse] feel that you need more help, that should be offered*  
5 *definitely. Or if it's a waste of time, cos you just literally will go back to how you were*  
6 *before, I think.* ' EPC, patient 11

11 Some patients suggested some aspects of EPC could be delivered within a group, as they had  
12 found it reassuring to talk to other patients about their experiences and to hear about theirs.  
13 However, other patients thought a group environment might inhibit what individuals  
14 discussed, acknowledging that they themselves would struggle to publically talk about their  
15 emotions.

22 Some patients had been care coordinated to other services, e.g. to their GP or to IAPT  
23 services, and had found this beneficial. However, six EPC patients said they would not  
24 discuss their mental health with their GP, believing that their GP would only prescribe an  
25 antidepressant:  
26  
27  
28  
29  
30

31 *I'd say what's the point in me going to the doctors, he gives me these bloody tablets,*  
32 *I'm not going to live on sodding tablets, what's the point?' EPC, patient 9*

36 Nurses commented that patients who had scored just below 10 on the PHQ-9 may have  
37 benefited from receiving psychological support. They also raised the possibility of delivering  
38 psychological support to groups rather than individual patients, as they too realised that  
39 individuals could benefit from talking about their experiences with others:  
40  
41  
42  
43  
44

45 *Patients get a huge amount of benefit just in talking to each other, don't they, and so*  
46 *the problem, the trouble solving, the solutions, "oh I do this", and just seeing how*  
47 *other people are getting on, the little supportive networks that they strike up when*  
48 *they're actually in the waiting room waiting for us to assess them and they've already*  
49 *got their own counselling and social network going on there, so I do recognise the*  
50 *power of actually getting them together as a group.* ' Nurse 5  
51  
52  
53  
54  
55  
56  
57  
58  
59  
60



1  
2  
3 Yet, like patients, they also acknowledged that some patients would not want to discuss their  
4 personal views in front of others. A suggested possible solution was to have an introductory  
5 EPC session in a group setting, and then offer one-to-one sessions to explore personal issues.  
6  
7 In terms of where to provide psychological support, nurses were aware that often patients did  
8 not want to be referred to their GP and described how patients had declined referrals to other  
9 services for their mental health. They also felt that integrating psychological care within  
10 cardiac rehabilitation had led to patients being more receptive and willing to address their  
11 mental health:  
12  
13  
14  
15  
16  
17  
18  
19

20  
21 *'...ninety percent of the time people would say "no I don't want to do that [be*  
22 *referred] I'm just going to work through it, I'm going to see how I get on". So actually*  
23 *being able to offer an extra option that didn't involve all of that, people were more*  
24 *receptive.'* Nurse 2  
25  
26  
27  
28

29  
30 Nurses also remarked that when they had referred patients to another service, they were not  
31 informed whether or not the patients had attended. Thus, although recognised as a challenge,  
32 most nurses commented that if additional resources could be made available, then integrating  
33 psychological support, such as EPC, within cardiac rehabilitation programmes would be the  
34 ideal situation.  
35  
36  
37  
38  
39

#### 40 **Discussion**

41  
42 Both patient and nurse accounts highlighted the need to provide psychological support to  
43 patients with symptoms of depression receiving cardiac rehabilitation. Patients detailed the  
44 significant emotional impact their cardiac event had on them, and described psychological  
45 support as not only key to their mental recovery but also as supporting their physical  
46 wellbeing. Prior to their involvement in CADENCE, nurses had viewed psychological care  
47 as an essential part of their role. The training they had received during the CADENCE trial  
48  
49  
50  
51  
52  
53  
54  
55  
56  
57  
58  
59  
60

1  
2  
3 had led them to formalise their approach and to spend more dedicated time one-to-one time  
4  
5 with patients.  
6

7 Both patients and nurses' accounts suggested that psychological support should be embedded  
8  
9 within cardiac rehabilitation programmes, rather than provided out with through a parallel  
10  
11 service, and that EPC appeared effective in treating symptoms of depression in this patient  
12  
13 group. However, it was apparent that nurses were time-constrained and found it challenging  
14  
15 to provide psychological support within their existing workloads.  
16  
17

18 In terms of future delivery of psychological support, this study raised issues relevant to when,  
19  
20 where and how this could be done. Patients interviewed argued for psychological support to  
21  
22 commence earlier, either during hospital immediately following a cardiac event or upon  
23  
24 hospital discharge. On average, most patients spend only three days in hospital following a  
25  
26 heart attack<sup>25</sup> and are discharged back to the community with no formal support during the  
27  
28 initial weeks prior to commencing cardiac rehabilitation. Patients in this study talked about  
29  
30 feeling lonely and cut adrift from professional help following hospital discharge, and this  
31  
32 appeared to compound their low mood. They also described a sense of loss; loss of ability,  
33  
34 loss of confidence and a loss of roles. The theme of loss was one that underpinned all the  
35  
36 interviews conducted by Simmonds et al<sup>14</sup> in their study of patients' views and experiences of  
37  
38 living with depression and CHD. It is also discussed by Barley et al<sup>26</sup>, who report primary  
39  
40 care practitioners viewing patients' loss of a valued role or ability to fulfil responsibilities as  
41  
42 contributing to the development of depression following a cardiac event. In addition to  
43  
44 suggesting that psychological support commenced earlier, patients also suggested it  
45  
46 continued after discharge from a rehabilitation programme where necessary. Although  
47  
48 evidence suggests depression after cardiac rehabilitation is not common, when present it is  
49  
50 usually associated with other forms of psychological stress.<sup>27</sup> As there is an association  
51  
52 between psychological stress and post-cardiac rehabilitation morality, it has been suggested  
53  
54  
55  
56  
57  
58  
59  
60

1  
2  
3 that patients with CHD are assessed for psychological risk factors both prior to and after  
4  
5 receiving cardiac rehabilitation.<sup>27</sup>  
6

7  
8 Our findings suggest psychological support should be embedded within cardiac rehabilitation  
9  
10 programmes, as patients welcomed cardiac nurses attending to both their physical and mental  
11  
12 wellbeing, viewing this as providing a more holistic approach. In addition, nurses felt  
13  
14 integrating psychological support within existing programmes encouraged patients to  
15  
16 acknowledge their need for psychological input. Nurses were also aware that patients often  
17  
18 declined referrals to other services, and both patients and nurses mentioned patients'  
19  
20 reluctance to consult a GP about their mental health.  
21

22  
23 Whole system approaches that integrate mental and physical health care are viewed as the  
24  
25 most appropriate way to support patients living with mental and physical morbidity,<sup>28</sup> and  
26  
27 other researchers have reported patients with CHD and depression as being ambivalent about  
28  
29 seeking help from a GP.<sup>14</sup> Here patients linked this reluctance to their assumption that a GP  
30  
31 would prescribe an antidepressant. Yet GPs may be hesitant to prescribe antidepressants for  
32  
33 patients with CHD, as they are aware patients may be unwilling to take an antidepressant and  
34  
35 view other forms of treatment that encourage patients to be physically and socially active as  
36  
37 potentially more effective for depression in this patient population, e.g., exercise on referral,  
38  
39 cardiac rehabilitation.<sup>26</sup>  
40  
41

42  
43 Another reason patients might be reluctant to seek help is the stigma that surrounds mental  
44  
45 health. Nurses reported patients only talking about how they felt once the nurse had screened  
46  
47 them as positive for symptoms of depression and/or at risk of suicide or self-harm. Non-  
48  
49 disclosure of mental health problems by patients with physical conditions can compound  
50  
51 management problems.<sup>29</sup> Here it was apparent that nurses had been able to identify patients  
52  
53 at risk because they had been asked to screen patients using the PHQ-9, which explicitly asks  
54  
55 about suicidal ideation. Thus, cardiac teams may want to consider using the PHQ-9 in the  
56  
57  
58  
59  
60

1  
2  
3 future, alongside training to ensure nurses manage self-harm risk appropriately and in a way  
4  
5 that is consistent with clinical guidelines.<sup>17, 18</sup>  
6

7  
8 Although both patients and nurses advocated for psychological support to be provided within  
9  
10 rehabilitation programmes, both acknowledged that nurses found it challenging to provide  
11  
12 this care within their existing workloads. Group-based approaches were suggested, as both  
13  
14 sets of interviewees were aware that patients could benefit from interacting with other cardiac  
15  
16 patients. This could reduce nurse workload but whether group delivery would be possible  
17  
18 would partly depend on the intervention. For an intervention such as EPC, where there were  
19  
20 both general and patient-specific components, it might be possible for nurses to deliver some  
21  
22 aspects of the intervention in a group setting and other components on a one-to-one. For  
23  
24 example, BA could be discussed during group educational talks and care-coordination  
25  
26 delivered on an individual basis. Doing so would ensure all patients receiving cardiac  
27  
28 rehabilitation received information on BA; a move which would address the view expressed  
29  
30 by nurses here, that psychological support could benefit all patients and not just those who  
31  
32 had screened positive for depression. Such an approach would concur with the recent  
33  
34 findings of Blumenthal et al,<sup>30</sup> who observed the potential benefit to longer-term  
35  
36 psychological morbidity when stress management was offered to all patients following an  
37  
38 acute cardiac event.  
39  
40  
41  
42

43 In terms of what psychological support should be provided, this paper did not focus on  
44  
45 patients and nurses' specific views of EPC, as the aim was to assess their more general views  
46  
47 on provision of psychological support. However, it was evident that nurses and patients  
48  
49 viewed the patient-led, nurse supported BA component of the intervention as effective in  
50  
51 helping patients manage their depression, and this component fits with NICE guidance for  
52  
53 treatment of depression in people with physical health problems, as it proposes that  
54  
55 individuals with depression and physical health problems start on low intensity treatments,  
56  
57  
58  
59  
60

1  
2  
3 including guided self-help and physical activation.<sup>18</sup> In addition, a recent process evaluation  
4  
5 reports that patients who have received BA for depression perceive it as leading to both  
6  
7 cognitive and behavioural changes, which they view as not only improving their symptoms  
8  
9 but also their lives more broadly.<sup>31</sup> In terms of care coordination, whilst our findings suggest  
10  
11 psychological care should be embedded within cardiac rehabilitation programmes, some  
12  
13 patients had benefited from being referred to other services and this did give patients greater  
14  
15 treatment choice. Lastly, the intervention was developed and revised in response to  
16  
17 comments from patients and nurses involved in the feasibility study that preceded the  
18  
19 CADENCE pilot trial.<sup>32</sup> Thus, EPC is more likely than other interventions to be acceptable  
20  
21 to patients and nurses, although findings from the pilot trial showed it remained too  
22  
23 burdensome for nurses to deliver long-term.  
24  
25  
26

### 27 ***Study strengths and weaknesses***

28  
29 Individuals recruited to the CADENCE pilot trial needed to score 10 or more on the PHQ-9  
30  
31 in order to be eligible to take part. Strictly speaking this score reflects depressive symptoms,  
32  
33 rather than a formal clinical diagnosis of depression. However, in the UK, front-line primary  
34  
35 care mental health services (e.g. GPs, IAPT mental health workers) routinely use the PHQ-9  
36  
37 to diagnose and actively manage/treat depression. In addition, the PHQ-9 has been found to  
38  
39 be as good as a diagnostic gold standard in detecting depression.<sup>33</sup>  
40  
41  
42

43 The relatively small number of patients and nurses recruited to the trial limited who could be  
44  
45 approached for interview and thus the possibility of sampling individuals purposefully to  
46  
47 ensure maximum variation within the sample in relation to participant characteristics. This  
48  
49 means we cannot be confident that data saturation was reached. It also means certain groups  
50  
51 of individuals are not represented, e.g. none of the patients interviewed were from an ethnic  
52  
53 minority. This might limit generalisability of the findings to the wider population of patients  
54  
55 or nurses using cardiac rehabilitation services in the UK. However, we interviewed patients  
56  
57  
58  
59  
60

1  
2  
3 from seven different teams and nurses from four of the five participating intervention teams.

4  
5 As many of the key findings were evident across the interviews, there is little reason to think  
6  
7 the findings reported here would not be relevant to other cardiac rehabilitation programmes.  
8

### 9 10 ***Conclusions and implications***

11 Both patients and nurses highly value psychological support being delivered by nurses within  
12  
13 cardiac rehabilitation programmes, but time and resource constraints raise significant barriers  
14  
15 in terms of implementation, so alternative approaches need to be considered. Given that  
16  
17 nurses viewed provision within rehabilitation programmes as ideal, and mentioned good  
18  
19 relations with local IAPT services, an alternative approach could be nurses co-ordinating  
20  
21 IAPT-trained psychological wellbeing practitioners to provide psychological support within  
22  
23 cardiac programmes. In terms of treatment offered, it could include BA, as this was viewed  
24  
25 as potentially effective by patients and nurses, and is a treatment that can be successfully  
26  
27 delivered by junior mental health workers.<sup>20</sup>  
28  
29  
30

### 31 32 **Acknowledgements**

33  
34 We would like to thank all the nurses and patients who agreed be interviewed as part of their  
35  
36 involvement in the CADENCE pilot trial. We would also like to acknowledge members of  
37  
38 the CADENCE team who are not authors on this paper but were involved in the CADENCE  
39  
40 pilot trial and supported the qualitative work: Professor Rob Anderson, Mrs Antoinette  
41  
42 Davey, Professor Andrew Gibson, Dr David Kessler, Mr Luke Knight, Professor Willem  
43  
44 Kuyken, Professor Rod Taylor, Dr Obioha Ukoumunne, Dr Fiona Warren, Ms Julie Chudley,  
45  
46 and Dr Christine Wright.  
47  
48

### 49 50 **Contributors**

51  
52 KT was the principal investigator for the qualitative work nested within the CADENCE study  
53  
54 and led on writing this manuscript. RW conducted and analysed the interviews on which the  
55  
56 paper is based. JC was chief investigator for the CADENCE study, and SR the scientific  
57  
58  
59  
60

1  
2  
3 lead. DR, CD, and MG were other members of the CADENCE team. All authors  
4  
5 contributed to editing of the final manuscript and the refining of its intellectual content.  
6

### 7 8 **Funding**

9  
10 This work was funded by the UK NIHR Health Technology Assessment Programme (project  
11  
12 number 12/189/06). The views and opinions expressed in this paper are those of the authors  
13  
14 and do not necessarily reflect those of the Health Technology Assessment Programme,  
15  
16 NIHR, NHS or the Department of Health.  
17

### 18 19 **Competing interests**

20  
21 We have read and understood BMJ policy on declaration of interests and declare that we have  
22  
23 no competing interests.  
24

### 25 26 **Data sharing statement**

27  
28 The datasets analysed during the current study are not publicly available, as participants were  
29  
30 not asked to consent to this at the time of data collection. However, if requests for data  
31  
32 sharing are made, the University of Bristol Data Access Committee will consider them and  
33  
34 decide whether or not they can be met.  
35

### 36 37 **References**

- 38  
39 1. Thombs BD, Ziegelstein RC, Pilote L, *et al*. Somatic symptom overlap in Beck Depression  
40  
41 Inventory-II scores following myocardial infarction. *Br J Psychiatry* 2010;197:61-6.  
42  
43 2. Singleton N, Bumpstead R, O'Brien M, *et al*. *Psychiatric morbidity among adults living in*  
44  
45 *private households, 2000*. London:HMSO, 2001.  
46  
47 3. Barth J, Schumacher M, Herrmann-Lingen C. Depression as a risk factor for  
48  
49 mortality in patients with coronary heart disease: A meta-analysis. *Psychosom Med*  
50  
51 2004;66:802-13.  
52  
53 4. Nicholson A, Kuper H, Hemingway H. Depression as an aetiologic and prognostic factor  
54  
55 in coronary heart disease: a meta-analysis of 6362 events among 146538 participants in 54  
56  
57 observational studies. *Eur Heart J* 2006;27:2763-74.  
58  
59  
60

- 1  
2  
3 5. van Melle JP, de Jonge P, Spijkerman TA, *et al.* Prognostic association of depression  
4 following myocardial infarction with mortality and cardiovascular events: a meta-analysis.  
5 *Psychosom Med* 2004;66:814-22.  
6  
7
- 8 6. Meijer A, Conradi HJ, Bos EH, Thombs BD, van Melle JP, de Jonge P. Prognostic  
9 association of depression following myocardial infarction with mortality and cardiovascular  
10 events: a meta-analysis of 25 years of research. *Gen Hosp Psychiatry* 2011;33:203-16.  
11  
12
- 13 7. Gale CR, Batty GD, Osborn DPJ, Tynelius P, Rasmussen F. Mental disorders across the  
14 adult life course and future coronary heart disease evidence for general susceptibility.  
15 *Circulation* 2014;129:186-93.  
16  
17
- 18 8. Carney RM, Freedland KE, Miller GE, Jaffe AS. Depression as a risk factor for cardiac  
19 mortality and morbidity. A review of potential mechanisms. *J Psychosom Res* 2002;897-  
20 902.  
21  
22
- 23 9. Dickens C. Depression in people with coronary heart disease: prognostic significance and  
24 mechanisms. *Curr Cardiol Rep* 2015;17:83.  
25  
26
- 27 10. British Association for Cardiovascular Prevention and Rehabilitation. *The BACPR*  
28 *Standards and Core Components for Cardiovascular Disease Prevention and Rehabilitation*  
29 *2012*. London:2012.  
30  
31
- 32 11. Piepoli M, Corra U, Adamopoulos S, *et al.* Secondary prevention in the clinical  
33 management of patients with cardiovascular diseases. Core components, standards and  
34 outcome measures for referral and delivery: a policy statement from the cardiac rehabilitation  
35 section of the European Association for Cardiovascular Prevention & Rehabilitation.  
36 Endorsed by the Committee for Practice Guidelines of the European Society of Cardiology.  
37 *Eur J Prev Cardiol* 2014;21:664-81.  
38  
39
- 40 12. Lichtman JH, Froelicher ES, Blumenthal JA, *et al.* Depression as a risk factor for poor  
41 prognosis among patients with acute coronary syndrome: Systematic review and  
42 recommendations. A scientific statement from the American Heart Association. *Circulation*  
43 2014;129:1350-69.  
44  
45
- 46 13. National Audit of Cardiac Rehabilitation (NACR): *Annual statistical report*.  
47 London:British Heart Foundation, 2016.  
48  
49
- 50 14. Simmonds RL, Tylee A, Walters P, Rose D. Patients' perceptions of depression and  
51 coronary heart disease: a qualitative UPBEAT-UK study. *BMC Fam Pract* 2013;14:38.  
52 doi:10.1186/1471-2296-14-38.  
53  
54  
55  
56  
57  
58  
59  
60



- 1  
2  
3 15. Paquet M, Bolduc N, Xhignesse M, Vanasse A. Re-engineering cardiac rehabilitation  
4 programmes: considering the patient's point of view. *J Adv Nurs* 2005;51:567–576  
5  
6  
7 16. Richards S, Dickens C, Anderson R, Richards DA, Taylor R; Ukoumunne O, Kessler D,  
8 Turner K, Kuyken W, Gandhi M, Knight L, Gibson A, Davey, A, Warren F, Winder R,  
9 Wright C, Campbell J. Assessing the effectiveness of enhanced psychological care for  
10 patients with depressive symptoms attending cardiac rehabilitation compared with treatment  
11 as usual (CADENCE): A study protocol for a pilot cluster randomised controlled trial and  
12 qualitative interview study. *Trials* 2016;17:59. doi:10.1186/s13063-016-1184-9.  
13  
14  
15 17. National Institute for Health and Clinical Excellence. *The treatment and management of*  
16 *depression in adults (Clinical Guideline 90)*. London: NICE, 2009.  
17  
18  
19 18. National Institute for Health and Clinical Excellence. *Depression in adults with a chronic*  
20 *physical health problem: treatment and management (Clinical Practice Guideline No 91)*.  
21 London: NICE, 2009.  
22  
23  
24 19. Jacobson NS, Martell CR, Dimidjian S. Behavioral Activation Treatment for Depression:  
25 Returning to Contextual Roots. *Clin Psychol Sci Prac* 2001;8:255-70.  
26  
27  
28 20. Richards DA, Ekers D, McMillan D, *et al*. Cost and Outcome of Behavioural Activation  
29 versus Cognitive Behavioural Therapy for Depression (COBRA): a randomised, controlled,  
30 non-inferiority trial. *Lancet* 2016;388:871-880.  
31  
32  
33 21. Kroenke K, Spitzer RL, Williams JB. The PHQ-9: validity of a brief depression severity  
34 measure. *J Gen Intern Med* 2001;16:606-13.  
35  
36  
37 22. Sturges JE, Hanrahan KJ. Comparing Telephone and Face-to-Face Qualitative  
38 Interviewing: a Research Note. *Qual Res* 2004;4:107-18.  
39  
40  
41 23. Ritchie J and Spencer L. in Bryman A, Burgess RG (eds). *Analyzing Qualitative Data*.  
42 London: Routledge, 1994:173-194.  
43  
44  
45 24. Zigmond AS, Snaith RP. The hospital anxiety and depression scale. *Acta Psychiatr Scand*  
46 1983;67:361-70.  
47  
48  
49 25. Myocardial Ischaemia National Audit Project. *How the NHS cares for patients with heart*  
50 *attack. Annual Public Report April 2014 – March 2015*. London:University College London,  
51 2017.  
52  
53  
54  
55  
56  
57  
58  
59  
60

- 1  
2  
3 26. Barley EA, Walters P, Tylee A, Murray J. General practitioners' and practice nurses'  
4 views and experience of managing depression in coronary heart disease: a qualitative  
5 interview study. *BMC Fam Pract* 2012, 13:1.  
6  
7  
8  
9 27. Kachur S, Menezes AR, De Schutter A, Milani RV, Lavie CJ. Significance of comorbid  
10 psychological stress and depression on outcomes after cardiac rehabilitation. *Am J Med*  
11 2016;129:1316-1321.  
12  
13  
14 28. Coventry P, Small N, Panagioti M, Adeyemi I, Bee P. Living with complexity;  
15 marshalling resources: a systematic review and qualitative meta-synthesis of lived experience  
16 of mental and physical multimorbidity. *BMC Fam Pract* 2015;16:171.  
17  
18  
19 29. Mercer SW, Gunn J, Bower P, Wyke S, Guthrie B. Managing patients with mental and  
20 physical multimorbidity. Changes are needed in policy, research, and practice. *BMJ*  
21 2012;345:e5559.  
22  
23  
24 30. Blumenthal JA, Sherwood A, Smith PJ *et al*. Enhancing cardiac rehabilitation with stress  
25 management training: a randomized clinical efficacy trial. *Circulation* 2016;135. doi:  
26 10.1161/CIRCULATIONAHA.115.018926.  
27  
28  
29 31. Finning K, Richards DA, Moore L, *et al*. Cost and outcome of behavioural activation  
30 versus cognitive behavioural therapy for depression (COBRA): a qualitative process  
31 evaluation. *BMJ* 2017;7:e014161.  
32  
33  
34 32. Winder R, Richards SH, Campbell JL, *et al*. Development and refinement of a complex  
35 intervention within cardiac rehabilitation services: experiences from the CADENCE  
36 feasibility study. *Pilot and Feasibility Stud* 2017;3:9.  
37  
38  
39 33. Gilbody S, Richards D, Barkham M. Diagnosing depression in primary care using self-  
40 completed instruments: UK validation of PHQ-9 and CORE-OM. *BJGP* 2007;57:650-652.  
41  
42  
43  
44  
45  
46  
47  
48  
49  
50  
51  
52  
53  
54  
55  
56  
57  
58  
59  
60

### Consolidated criteria for reporting qualitative studies (COREQ): 32-item checklist

| No. Item                                       | Guide questions/description                                                                                                                              | Reported on Page #                                                                                                                                     |
|------------------------------------------------|----------------------------------------------------------------------------------------------------------------------------------------------------------|--------------------------------------------------------------------------------------------------------------------------------------------------------|
| <b>Domain 1: Research team and reflexivity</b> |                                                                                                                                                          |                                                                                                                                                        |
| <i>Personal Characteristics</i>                |                                                                                                                                                          |                                                                                                                                                        |
| 1. Interviewer/facilitator                     | Which author/s conducted the interviews?                                                                                                                 | Page 7 and 8: RW conducted the interviews.                                                                                                             |
| 2. Credentials                                 | What were the researcher's credentials? E.g. PhD, MD                                                                                                     | BSc, RGN.                                                                                                                                              |
| 3. Occupation                                  | What was their occupation at the time of the study?                                                                                                      | Research Fellow.                                                                                                                                       |
| 4. Gender                                      | Was the researcher male or female?                                                                                                                       | Female.                                                                                                                                                |
| 5. Experience and training                     | What experience or training did the researcher have?                                                                                                     | Page 7: 'RW, a researcher with over 10 years' experience of conducting qualitative research'                                                           |
| <i>Relationship with participants</i>          |                                                                                                                                                          |                                                                                                                                                        |
| 6. Relationship established                    | Was a relationship established prior to study commencement?                                                                                              | Page 8: RW was known to the nurses, as she had observed the two training days.                                                                         |
| 7. Participant knowledge of the interviewer    | What did the participants know about the researcher? e.g. personal goals, reasons for doing the research                                                 | Participants were told that RW was the researcher employed on the study to conduct the qualitative work.                                               |
| 8. Interviewer characteristics                 | What characteristics were reported about the interviewer/facilitator? e.g. Bias, assumptions, reasons and interests in the research topic                | None were reported.                                                                                                                                    |
| <b>Domain 2: study design</b>                  |                                                                                                                                                          |                                                                                                                                                        |
| <i>Theoretical framework</i>                   |                                                                                                                                                          |                                                                                                                                                        |
| 9. Methodological orientation and Theory       | What methodological orientation was stated to underpin the study? e.g. grounded theory, discourse analysis, ethnography, phenomenology, content analysis | The study drew on the principles of grounded theory in terms of insights from earlier data collection informing the focus of later interviews (page 8) |

|                                  |                                                                                       |                                                                                                                                                                                                                                                                                                                                      |
|----------------------------------|---------------------------------------------------------------------------------------|--------------------------------------------------------------------------------------------------------------------------------------------------------------------------------------------------------------------------------------------------------------------------------------------------------------------------------------|
| <i>Participant selection</i>     |                                                                                       |                                                                                                                                                                                                                                                                                                                                      |
| 10. Sampling                     | How were participants selected?<br>e.g. purposive, convenience, consecutive, snowball | Page 7: we explain that, ‘as it took longer than expected to recruit patients to the trial, in the end, all 15 EPC patients and 6 of the UC patients were approached for interview.<br><br>Page 8: we explain that all the nurses from the four intervention teams who recruited patients were interviewed.                          |
| 11. Method of approach           | How were participants approached? e.g. face-to-face, telephone, mail, email           | We explain (page 6) that all patients and nurses involved in the trial, at the time of being recruited to the study, agreed to their details being passed onto the qualitative research team so they could be approached for interview.<br><br>In terms of approaches used, RW contacted patients by telephone, and nurses by email. |
| 12. Sample size                  | How many participants were in the study?                                              | 18 patients (page 7) and 7 nurses (page 8) were interviewed.                                                                                                                                                                                                                                                                         |
| 13. Non-participation            | How many people refused to participate or dropped out?<br>Reasons?                    | Page 7: we explain that ‘Two of the EPC patients approached for interview were uncontactable and another EPC patient declined to be interviewed’.                                                                                                                                                                                    |
| <i>Setting</i>                   |                                                                                       |                                                                                                                                                                                                                                                                                                                                      |
| 14. Setting of data collection   | Where was the data collected?<br>e.g. home, clinic, workplace                         | We explain both patients and nurses were interviewed either face-to-face or by telephone (page 7 and 8).                                                                                                                                                                                                                             |
| 15. Presence of non-participants | Was anyone else present besides the participants and researchers?                     | No.                                                                                                                                                                                                                                                                                                                                  |
| 16. Description of sample        | What are the important characteristics of the sample? e.g. demographic data, date     | On page 7, we report patients’ gender, ethnicity, mean age and pre-treatment                                                                                                                                                                                                                                                         |

|                                        |                                                                               |                                                                                                                                                                                                 |
|----------------------------------------|-------------------------------------------------------------------------------|-------------------------------------------------------------------------------------------------------------------------------------------------------------------------------------------------|
|                                        |                                                                               | PHQ-9 score. We also detail what cardiac events patients reported. On page 8, we state all the nurses interviewed were female.                                                                  |
| <i>Data collection</i>                 |                                                                               |                                                                                                                                                                                                 |
| 17. Interview guide                    | Were questions, prompts, guides provided by the authors? Was it pilot tested? | We explain on pages 7 and 8 topic guides were used. The guides were not pilot tested.                                                                                                           |
| 18. Repeat interviews                  | Were repeat interviews carried out? If yes, how many?                         | No                                                                                                                                                                                              |
| 19. Audio/visual recording             | Did the research use audio or visual recording to collect the data?           | We explain on page 8 all the interviews were audio-recorded.                                                                                                                                    |
| 20. Field notes                        | Were field notes made during and/or after the interview or focus group?       | Field notes were taken immediately after each interview.                                                                                                                                        |
| 21. Duration                           | What was the duration of the interviews or focus group?                       | Length of the interviews is provided on page 8                                                                                                                                                  |
| 22. Data saturation                    | Was data saturation discussed?                                                | Data saturation is mentioned in Discussion, page 20.                                                                                                                                            |
| 23. Transcripts returned               | Were transcripts returned to participants for comment and/or correction?      | No.                                                                                                                                                                                             |
| <b>Domain 3: analysis and findings</b> |                                                                               |                                                                                                                                                                                                 |
| <i>Data analysis</i>                   |                                                                               |                                                                                                                                                                                                 |
| 24. Number of data coders              | How many data coders coded the data?                                          | We explain on page 8, two researchers coded data.                                                                                                                                               |
| 25. Description of the coding tree     | Did authors provide a description of the coding tree?                         | No.                                                                                                                                                                                             |
| 26. Derivation of themes               | Were themes identified in advance or derived from the data?                   | On page 8, we have written 'Initially, KMT and RW independently read a sample of nurse and patient transcripts in order to identify emerging themes and to develop a preliminary coding frame.' |
| 27. Software                           | What software, if applicable, was used to manage the data?                    | We state on page 9 'transcripts were manually coded and data pertaining to each code summarised in tables using an approach based on framework                                                  |

|                                  |                                                                                                                                 |                                                                                                                                                                                                       |
|----------------------------------|---------------------------------------------------------------------------------------------------------------------------------|-------------------------------------------------------------------------------------------------------------------------------------------------------------------------------------------------------|
|                                  |                                                                                                                                 | analysis'                                                                                                                                                                                             |
| 28. Participant checking         | Did participants provide feedback on the findings?                                                                              | No.                                                                                                                                                                                                   |
| <i>Reporting</i>                 |                                                                                                                                 |                                                                                                                                                                                                       |
| 29. Quotations presented         | Were participant quotations presented to illustrate the themes/findings? Was each quotation identified? e.g. participant number | Quotes have been used in the Results section and, as explained on page 9, 'according to whether a patient or nurse is being quoted, and using the interviewee's assigned identification (ID) number.' |
| 30. Data and findings consistent | Was there consistency between the data presented and the findings?                                                              | Yes                                                                                                                                                                                                   |
| 31. Clarity of major themes      | Were major themes clearly presented in the findings?                                                                            | Yes                                                                                                                                                                                                   |
| 32. Clarity of minor themes      | Is there a description of diverse cases or discussion of minor themes?                                                          | We have indicated when a view was expressed by just one individual, e.g. page 9, 11, 13                                                                                                               |
